1 **Brain stimulation boosts perceptual learning by altering sensory GABAergic plasticity**  
2 **and functional connectivity**

3 Vasilis M Karlaftis\*<sup>1</sup>, Polytimi Frangou\*<sup>1</sup>, Cameron Higgins<sup>2</sup>, Diego Vidaurre<sup>2,3</sup>, Joseph J  
4 Ziminski<sup>1</sup>, Charlotte J Stagg<sup>2</sup>, Uzay E Emir<sup>4</sup>, Zoe Kourtzi<sup>1</sup>

5

6 <sup>1</sup>Department of Psychology, University of Cambridge, Cambridge UK

7 <sup>2</sup>Wellcome Centre for Integrative Neuroimaging, University of Oxford, Oxford, UK

8 <sup>3</sup>Center of Functionally Integrative Neuroscience, Department of Clinical Medicine, Aarhus  
9 University, Aarhus, Denmark

10 <sup>4</sup>Purdue University School of Health Sciences, West Lafayette, Indiana, USA

11 \*These authors contributed equally to this work

12

13 *Short title:* tDCS-induced learning and brain plasticity

14

15 *Corresponding author:*

16 Zoe Kourtzi

17 Department of Psychology

18 University of Cambridge

19 Downing Street, CB2 3EB

20 Cambridge, UK

21 Email: zk240@cam.ac.uk

## 22 **Abbreviations**

23 CRLB: Cramer-Rao lower bound

24 CSF: cerebrospinal fluid

25 EPI: echo-planar imaging

26 FO: Fractional Occupancy

27 Glu: Glutamate

28 HMM: Hidden Markov Models

29 ICA: Independent Component Analysis

30 IPS: intra-parietal sulcus

31 MNI: Montreal Neurological Institute

32 MRS: Magnetic Resonance Spectroscopy

33 NAA: N acetylaspartate

34 OCT: occipito-temporal cortex

35 PCA: Principal Component Analysis

36 ROI: region of interest

37 rs-fMRI: resting-state functional Magnetic Resonance Imaging

38 SN: signal-in-noise

39 SNR: Signal-to-noise ratio

40 SR: Switching Rate

41 tDCS: transcranial direct current stimulation

42 **Abstract**

43 Interpreting cluttered scenes—a key skill for successfully interacting with our environment—  
44 relies on our ability to select relevant sensory signals while filtering out noise. Training is  
45 known to improve our ability to make these perceptual judgements by altering local processing  
46 in sensory brain areas. Yet, the brain-wide network mechanisms that mediate our ability for  
47 perceptual learning remain largely unknown. Here, we combine transcranial direct current  
48 stimulation (tDCS) with multi-modal brain measures to modulate cortical excitability during  
49 training on a signal-in-noise task (i.e. detection of visual patterns in noise) and test directly the  
50 link between processing in visual cortex and its interactions with decision-related areas (i.e.  
51 posterior parietal cortex). We test whether brain stimulation alters inhibitory processing in  
52 visual cortex, as measured by magnetic resonance spectroscopy (MRS) of GABA and  
53 functional connectivity between visual and posterior parietal cortex, as measured by resting  
54 state functional magnetic resonance imaging (rs-fMRI). We show that anodal tDCS during  
55 training results in faster learning and decreased GABA+ during training, before these changes  
56 occur for training without stimulation (i.e. sham). Further, anodal tDCS decreases occipito-  
57 parietal interactions and time-varying connectivity across the visual cortex. Our findings  
58 demonstrate that tDCS boosts learning by accelerating visual GABAergic plasticity and  
59 altering interactions between visual and decision-related areas, suggesting that training  
60 optimises gain control mechanisms (i.e. GABAergic inhibition) and functional inter-areal  
61 interactions to support perceptual learning.

## 62 **Introduction**

63 Interacting successfully in our environments entails discerning relevant information from  
64 clutter and identifying target objects in busy scenes. Training is shown to improve such  
65 perceptual judgements—a skill known as perceptual learning—by altering processing in  
66 sensory (i.e. visual) and decision-related (i.e. posterior parietal) areas. For example, perceptual  
67 learning (i.e. training on a visual discrimination task) has been shown to alter functional  
68 connectivity—as measured by rs-fMRI—between visual and posterior parietal cortex (Lewis  
69 et al., 2009). Further, we have previously shown that training in visual discrimination tasks  
70 alters GABAergic processing in visual cortex (Frangou et al., 2019, 2018)—as measured by  
71 MRS—, consistent with the role of GABAergic inhibition in brain plasticity (for a review see  
72 (Ip and Bridge, 2021)). Yet, the interactions between GABAergic plasticity in sensory areas  
73 and learning-dependent functional connectivity between sensory and decision-related areas for  
74 perceptual learning remain largely unknown.

75 Previous work has proposed that GABAergic inhibition shapes network connectivity  
76 (Kapogiannis et al., 2013; Mann and Paulsen, 2007; Shmuel and Leopold, 2008; Stagg et al.,  
77 2014). Here, we employ tDCS to modulate cortical excitability and test directly the link  
78 between local inhibitory processing in visual cortex—as measured by MRS GABA—and  
79 interactions between visual and decision-related areas (i.e. posterior parietal cortex)—as  
80 measured by static and time-varying (using Hidden Markov Models (HMM; (Vidaurre et al.,  
81 2018, 2017)) rs-fMRI connectivity. Anodal tDCS has been shown to be excitatory (Antal et al.,  
82 2004a; Nitsche and Paulus, 2000), result in decreased GABA levels in visual (Barron et al.,  
83 2016), frontal (Harris et al., 2019) and motor areas (Stagg et al., 2009), and facilitate visual  
84 (Frangou et al., 2018; Sczesny-Kaiser et al., 2016; Van Meel et al., 2016) and motor learning  
85 (O’Shea et al., 2017; Stagg et al., 2011). Further, anodal tDCS in the motor cortex has been

86 shown to facilitate learning by decreasing local GABA levels and increasing functional  
87 connectivity within the motor network at rest (Bachtiar et al., 2015; Stagg et al., 2014).

88 We ask whether anodal tDCS in occipito-temporal cortex (OCT) facilitates learning  
89 and alters GABAergic processing and brain network interactions. We trained participants in a  
90 signal-in-noise discrimination task (i.e. participants were asked to detect radial vs. concentric  
91 patterns embedded in noise) that has been shown to involve occipito-temporal and posterior  
92 parietal cortex (Chang et al., 2014; Frangou et al., 2019, 2018; Mayhew et al., 2012). We tested  
93 for changes in task performance, MRS GABA+ and rs-fMRI connectivity in three groups of  
94 participants: two intervention groups who received anodal vs. sham tDCS during training on  
95 the task, a no-intervention group who received neither stimulation nor training in the task. Our  
96 results show that anodal OCT stimulation results in faster learning and decreased GABA+  
97 during training, before these changes occur in the sham stimulation group. Further, anodal  
98 tDCS induces changes in occipito-parietal interactions and time-varying connectivity across  
99 the visual cortex. Finally, enhanced local temporal coherence in the visual cortex and decreased  
100 occipito-parietal connectivity relate to decreased OCT GABA+. Our findings suggest that  
101 tDCS boosts learning by altering visual GABAergic processing and network interactions  
102 between visual and decision-related areas.

103 **Results**

104 **Anodal tDCS improves performance in signal-in-noise discrimination**

105 We trained two intervention groups (anodal vs. sham tDCS on OCT) on a signal-in-noise (SN)  
106 task that involves participants discriminating shapes (radial vs. concentric Glass patterns)  
107 embedded in noise (Figure 1). Participants were asked to judge whether each stimulus  
108 presented per trial was radial vs. concentric.

109 Figure 1

110

111 We tested behavioural improvement in this task by comparing performance before (Pre), during  
112 (During) and after stimulation (Post) (see *Behavioural data analysis* in Methods). Our results  
113 showed that anodal OCT stimulation enhanced behavioural improvement in this task (Figure  
114 2a), consistent with our previous work (Frangou et al., 2018). In particular, a two-way repeated  
115 measures ANOVA showed a significant Group (Anodal, Sham) x Block (Pre, During, Post)  
116 interaction ( $F(1.78,76.40)=3.61$ ,  $p=0.037$ ) and main effect of Block ( $F(1.78,76.40)=8.94$ ,  
117  $p<0.001$ ). Performance before stimulation (i.e. Pre block) did not differ significantly between  
118 the two intervention groups ( $t(43)=1.02$ ,  $p=0.313$ ), suggesting that the observed differences in  
119 improvement were not due to variability in starting performance between the intervention  
120 groups. Further, comparing learning rate across training between the two groups (two-sample  
121 t-test) showed that participants in the Anodal group learned faster than participants in the Sham  
122 group ( $t(43)=2.31$ ,  $p=0.026$ ; Figure 2b).

123 Participants in the no-intervention (Control) group (i.e. no-stimulation, no-training  
124 group) showed no behavioural improvement in the SN task when we tested them before and  
125 after the scan ( $t(20)=0.18$ ,  $p=0.858$ ) nor in the contrast-detection task during the scan (one-way  
126 repeated measures ANOVA: main effect of Block:  $F(2.19,46.03)=0.82$ ,  $p=0.458$ ).

127

Figure 2

## 128 **Anodal tDCS results in GABA+ decrease earlier in training**

129 To test whether anodal tDCS alters GABAergic inhibition in OCT, we measured GABA+  
130 within an MRS voxel centred in the OCT (Figure 3) before, during and after anodal vs. sham  
131 stimulation in the OCT, while participants trained on the SN task. We compared GABA+ in  
132 the OCT for the intervention groups (i.e. anodal and sham stimulation groups who received  
133 task training) vs. the no-intervention group (i.e. no-stimulation, no-training). Comparing  
134 GABA+ change between groups, a two-way repeated measures ANOVA showed a significant  
135 Group (Anodal, Sham, Control) x Block (Pre, During, Post) interaction ( $F(4,120)=3.90$ ,  
136  $p=0.005$ ; Figure 4a) and main effect of Group ( $F(2,60)=5.25$ ,  $p=0.008$ ). Post-hoc comparisons  
137 across blocks showed significantly decreased GABA+ for the Anodal compared to the Control  
138 group ( $t=-3.21$ ,  $p=0.006$ , Bonferroni corrected), but no significant difference between Sham  
139 and Control ( $t=-1.93$ ,  $p=0.174$ , Bonferroni corrected) or Anodal and Sham ( $t=-1.22$ ,  $p=0.678$ ,  
140 Bonferroni corrected). Further, comparing the Anodal to the Control group showed  
141 significantly decreased GABA+ for both During ( $t(41)=-2.23$ ,  $p=0.031$ ) and Post blocks  
142 ( $t(41)=-3.77$ ,  $p=0.001$ ). In contrast, comparing the Sham to the Control group showed  
143 significantly decreased GABA+ for the Post ( $t(40)=-2.66$ ,  $p=0.011$ ) but not the During block  
144 ( $t(40)=-0.88$ ,  $p=0.387$ ). These results remained significant when we tested GABA+ referenced  
145 to N acetylaspartate (NAA) rather than water (Group x Block:  $F(4,120)=4.06$ ,  $p=0.004$ ; main  
146 effect of Group:  $F(2,60)=6.35$ ,  $p=0.003$ ; Anodal vs. Control:  $t=-3.53$ ,  $p=0.002$ , Bonferroni  
147 corrected; Anodal vs. Control at During block:  $t(41)=-2.74$ ,  $p=0.009$ , Anodal vs. Control at  
148 Post block:  $t(41)=-4.46$ ,  $p<0.001$ ; Sham vs. Control at Post block:  $t(40)=-2.78$ ,  $p=0.008$ ). Thus,  
149 our results demonstrate that training with (anodal) or without stimulation (sham) results in  
150 decreased GABA+ in visual cortex compared to a no intervention (i.e. no training nor  
151 stimulation) control. Interestingly, training with anodal stimulation decreases GABA+ in the  
152 OCT during and after stimulation, compared to training without stimulation (i.e. sham) that

153 shows decreases in GABA+ only after stimulation. These results suggest that anodal  
154 stimulation induces neurochemical changes earlier in the training, consistent with our  
155 behavioural results showing faster learning for anodal stimulation.

156 **Figure 3**

157

158 It is unlikely that these changes in GABA+ for the intervention groups were due to differences  
159 in MRS data quality (i.e. linewidth, Signal-to-noise ratio: SNR) between groups (Table S1). In  
160 particular, a two-way repeated measures ANOVA showed no significant Group x Block  
161 interaction (linewidth:  $F(4,120)=0.32$ ,  $p=0.864$ ; SNR:  $F(4,120)=0.72$ ,  $p=0.581$ ) nor main effect  
162 of Group (linewidth:  $F(2,60)=1.44$ ,  $p=0.246$ ; SNR:  $F(2,60)=0.85$ ,  $p=0.432$ ). Further, GABA+  
163 measured before stimulation did not significantly differ between groups (main effect of Group:  
164  $F(2,60)=2.20$ ,  $p=0.120$ ), suggesting that our results could not be simply due to variability in  
165 GABA+ before stimulation across groups. Finally, comparing glutamate measures between  
166 groups showed no significant Group x Block interaction ( $F(4,120)=0.80$ ,  $p=0.528$ ) nor main  
167 effect of Group ( $F(2,60)=0.37$ ,  $p=0.692$ ) or Block ( $F(2,120)=1.33$ ,  $p=0.269$ ), suggesting that  
168 our results are specific to GABA+.

169 Next, we tested whether changes in OCT GABA+ relate to behavioural performance.  
170 We computed percent GABA+ change during tDCS (During) compared to GABA+ before  
171 stimulation (Pre) to control for variability in baseline GABA+ measures (i.e. Pre). We  
172 measured GABA+ change during stimulation as our previous analysis showed GABA+  
173 changes during stimulation for the Anodal rather than the Sham group (Figure 4a). Correlating  
174 OCT GABA+ change with learning rate showed a significant negative correlation for the  
175 Anodal group ( $r(19)=-0.51$ ,  $p=0.019$ ; Figure 4b), but not for the Sham group ( $r(18)=0.25$ ,  
176  $p=0.289$ ; Figure 4b). These correlations were significantly different between groups (Fisher's  
177 z test:  $z=-2.41$ ,  $p=0.016$ ). Further, this relationship remained significant when controlling for



178 tissue composition within the MRS voxel, controlling for MRS data quality (i.e. linewidth,  
179 SNR), and using GABA+ referenced to NAA rather than water (Table S2). There was no  
180 significant correlation for OCT Glutamate (Glu) change and learning rate, suggesting that this  
181 result is specific to GABA (Table S2). We found no significant correlation between learning  
182 rate on the contrast-detection task and change in GABA+ for the Control group ( $r(20)=0.06$ ,  
183  $p=0.790$ ). Finally, there was no significant correlation between learning rate and OCT GABA+  
184 change for the post- compared to the pre-stimulation block for any group (Anodal:  $r(18)=-0.19$ ,  
185  $p=0.417$ ; Sham:  $r(18)=0.17$ ,  $p=0.473$ ; Control:  $r(20)=0.02$ ,  $p=0.945$ ), suggesting that our  
186 results are specific to the GABA+ change during stimulation. These results demonstrate that  
187 learning-dependent changes in GABA+ during training with anodal stimulation rather than  
188 training without stimulation (i.e. sham) relate to learning rate, suggesting that enhanced  
189 GABAergic plasticity due to tDCS in the OCT may facilitate faster learning in detecting targets  
190 in clutter.

#### 191 Figure 4

192

#### 193 **Anodal tDCS alters functional connectivity**

194 We next tested whether anodal tDCS during training on the SN task alters extrinsic (i.e.  
195 between OCT and intra-parietal sulcus [IPS]) or intrinsic (i.e. within OCT) connectivity as  
196 measured by rs-fMRI. First, we tested for changes in extrinsic OCT-IPS connectivity after vs.  
197 before intervention. A two-way repeated measures ANOVA showed a significant Group  
198 (Anodal, Sham) x Block (Pre, Post) interaction ( $F(1,35)=7.96$ ,  $p=0.008$ ; Figure 5a), but no  
199 significant main effect of Group ( $F(1,35)=2.44$ ,  $p=0.127$ ) or Block ( $F(1,35)=0.01$ ,  $p=0.924$ ).  
200 Post-hoc comparisons showed a significant decrease in OCT-IPS connectivity after training for  
201 the Anodal group ( $t(21)=-2.16$ ,  $p=0.042$ ), but no significant change for the Sham group  
202 ( $t(14)=1.96$ ,  $p=0.071$ ). Next, we asked whether changes in extrinsic connectivity relate to



228 OCT GABA+ change (during- vs. pre-stimulation). There were no significant correlations of  
229 change in intrinsic OCT connectivity with learning rate (Anodal:  $r(20)=0.26$ ,  $p=0.249$ ; Sham:  
230  $r(12)=0.52$ ,  $p=0.056$ ; Figure 6b). However, we observed a significant negative correlation for  
231 change in intrinsic OCT connectivity with change in OCT GABA+ for the Anodal group  
232 ( $r(14)=-0.52$ ,  $p=0.039$ ; Figure 6c), but not for the Sham group ( $r(13)=0.21$ ,  $p=0.453$ ; Figure  
233 6c). This relationship remained significant when controlling for tissue composition within the  
234 MRS voxel, controlling for MRS data quality, and using GABA+ referenced to NAA rather  
235 than water (Table S3). There was no significant correlation for OCT Glu change and learning  
236 rate, suggesting that this result is specific to GABA (Table S3). Taken together, our results  
237 show that increased local OCT connectivity relates to decreases in OCT GABA+ during anodal  
238 but not sham stimulation, providing converging evidence that enhanced GABAergic plasticity  
239 due to anodal tDCS in the OCT relates to local visual processing.

240 Figure 6

241

### 242 **Anodal tDCS alters time-varying functional connectivity during training**

243 Our functional connectivity analysis shows that our intervention (anodal tDCS during task  
244 training) alters occipito-parietal interactions that relate to GABAergic plasticity. However,  
245 static connectivity offers a summary measure of the synchrony between two brain regions  
246 across long timescales (i.e. 8mins for our rs-fMRI scans) that does not capture short-lived  
247 changes in inter-regional synchrony and how they propagate across different brain regions.  
248 Recent studies have proposed time-varying connectivity approaches for tracking changes in  
249 functional connectivity at finer timescales (Cohen, 2017; Hutchison et al., 2013; Preti et al.,  
250 2017). These methods have been shown to capture task and behavioural variability beyond  
251 static connectivity accounts (Calhoun et al., 2014; Eichenbaum et al., 2021). Here, we employ  
252 a time-varying connectivity analysis (i.e. HMM) to detect brain states that capture recurring

253 patterns of activity and connectivity over time and test whether our intervention alters these  
254 brain states.

255 We conducted this analysis using time courses from early and higher visual areas and  
256 posterior parietal cortex as defined by a topographic atlas ((Wang et al., 2015); Table S4). We  
257 set the number of states to 5 and decomposed the input time courses to 13 Principal Component  
258 Analysis (PCA) components (corresponding to 80% variance explained) across groups and  
259 blocks. Following previous work (Karapanagiotidis et al., 2020; Vidaurre et al., 2017), we then  
260 tested the robustness of the results for a range of these parameters (states: from 4 to 7, PCA:  
261 from 70% to 100%; Table S5). The 5 estimated states capture reoccurring temporal patterns  
262 across participants and are described by a mean activation map (Figure 7a) and a functional  
263 connectivity matrix (Figure S1): State 1 captures concurrent deactivation across all regions;  
264 State 2 captures time periods when OCT (i.e. LO1/2), IPS (i.e. IPS0 and IPS1/2) and V3b are  
265 co-active; State 3 captures time periods when V1 (dorsal and ventral) V2 (dorsal) are co-active;  
266 State 4 captures concurrent activation across all regions; State 5 captures time periods when  
267 IPS (i.e. IPS0), PHC, V3a and VO are co-active. Figure 7b illustrates the transition probabilities  
268 between these states averaged across participants, where higher (lower) values represent more  
269 (less) likely transitions from one state to another.

270 Figure 7

271

272 To test for temporal differences between anodal and sham OCT stimulation, we  
273 compared the time spent in each state (i.e. Fractional Occupancy: FO) before vs. after training  
274 per group. A two-way repeated measures ANOVA showed a significant State x Block  
275 interaction for the Anodal group ( $F(1.45,27.93)=6.22$ ,  $p=0.010$ ; Figure 7c), but no significant  
276 effects for the Sham group ( $F(1.35,18.82)=1.14$ ,  $p=0.319$ ; Figure 7c). Post-hoc comparisons  
277 showed that participants in the Anodal group spent more time after training in States 1 and 4

278 (State 1:  $t(21)=2.21$ ,  $p=0.038$ ; State 4:  $t(21)=3.46$ ,  $p=0.002$ ); that is, they spent more time in  
279 states capturing time periods of widespread concurrent deactivation and activation across the  
280 visual cortex. Previous work has suggested that large-scale synchronised activity might denote  
281 integration of information (Varela et al., 2001) and higher sensitivity in error detection  
282 (Breakspear et al., 2003). In contrast, participants in the Anodal group spent less time in States  
283 2 and 3 (State 2:  $t(21)=-2.44$ ,  $p=0.023$ ; State 3:  $t(21)=-2.63$ ,  $p=0.015$ ) that correspond to the  
284 OCT-IPS and the early visual (V1, V2) states, respectively. Comparing the switching rate (SR)  
285 between states before vs. after training showed that participants in the Anodal group switched  
286 more frequently between states after training ( $t(21)=2.30$ ,  $p=0.032$ ), while there was no  
287 significant change for the Sham group ( $t(14)=1.19$ ,  $p=0.254$ ).

288         These results complement our static connectivity results showing that anodal OCT  
289 stimulation during training in the SN task results in more widespread visual activity, and less  
290 localised activity in occipito-parietal and early visual regions. Further, anodal OCT stimulation  
291 may facilitate faster processing within brain states, as indicated by faster switching rate  
292 between states after training in the SN task.

## 293 **Discussion**

294 Previous work has shown that training results in changes in GABAergic inhibition that relate  
295 to improved performance in visual (Frangou et al., 2019, 2018; Shibata et al., 2017) and motor  
296 tasks (Kolasinski et al., 2019; Sampaio-Baptista et al., 2015). Here, we employ tDCS to  
297 modulate cortical excitability (Antal et al., 2004a; Nitsche and Paulus, 2000) and test the role  
298 of GABAergic inhibition in perceptual learning. tDCS has been shown to alter performance in  
299 visual tasks (Antal et al., 2004b; Battaglini et al., 2017; Spiegel et al., 2013; Zito et al., 2015)  
300 and facilitate learning in motor (O’Shea et al., 2017) and visual memory tasks (Barron et al.,  
301 2016) by reducing GABA. Here, we demonstrate that modulating GABAergic inhibition with  
302 tDCS during training boosts performance in perceptual judgements by altering local processing  
303 in visual cortex and functional connectivity between visual and posterior parietal areas that are  
304 involved in perceptual decision making. Our findings advance our understanding of  
305 GABAergic plasticity mechanisms for perceptual learning in the following respects.

306 First, we have previously shown that anodal tDCS during training enhances behavioural  
307 improvement on the signal-in-noise task that has been shown to relate to decreased GABAergic  
308 inhibition (Frangou et al., 2018). Here, we demonstrate that tDCS dissociates faster vs. slower  
309 learning and GABAergic plasticity. In particular, we show that training with anodal stimulation  
310 on the visual cortex results not only in behavioural improvement, but also faster learning  
311 compared to training without stimulation (i.e. sham stimulation). Further, training with anodal  
312 tDCS results in decreased OCT GABA+ during and after stimulation, in contrast to training  
313 without stimulation (i.e. sham) that shows a later decrease in OCT GABA+ (i.e. after  
314 stimulation). Next, we show that this decrease in GABA+ during anodal stimulation relates to  
315 faster learning, suggesting that anodal OCT stimulation during training accelerates perceptual  
316 learning by shifting GABAergic plasticity in the OCT earlier in the learning process.

317           Second, previous studies have shown that training in a range of tasks (e.g. motor or  
318 perceptual tasks) results in changes in functional connectivity (Guerra-Carrillo et al., 2014;  
319 Karlaftis et al., 2019; Kelly and Castellanos, 2014; Lewis et al., 2009; Sampaio-Baptista et al.,  
320 2015). Further, functional connectivity has been shown to relate to GABAergic inhibition  
321 (Frangou et al., 2019; Kapogiannis et al., 2013; Karlaftis et al., 2021; Mann and Paulsen, 2007;  
322 Nasrallah et al., 2017; Sampaio-Baptista et al., 2015; Shmuel and Leopold, 2008; Stagg et al.,  
323 2014) and can be altered by tDCS during training in a range of tasks: spatial navigation  
324 (Krishnamurthy et al., 2015), associative learning (Krause et al., 2017), language processing  
325 (Cao and Liu, 2018; Meinzer et al., 2012), visual selective attention (McDermott et al., 2019)  
326 and visual search (Callan et al., 2016). In our previous work, we showed that perceptual  
327 learning in the signal-in-noise task relates to functional connectivity within visual cortex and  
328 between visual and posterior parietal regions measured at rest before training (Frangou et al.,  
329 2019). Here, we test whether combining brain stimulation with training results in changes in  
330 functional connectivity. Our results demonstrate that anodal —rather than sham— OCT  
331 stimulation during training, decreases occipito-parietal connectivity. This is consistent with  
332 previous work showing that IPS is involved in identifying salient and task-relevant features  
333 early in training, while OCT is involved in tuning task-relevant feature representation after  
334 training (Chang et al., 2014; Frangou et al., 2019; Mayhew et al., 2012). In particular, our  
335 results show that increased occipito-parietal connectivity relates to faster learning for  
336 participants in the Sham group, who show slower improvement and are therefore engaged in  
337 earlier stages of learning. In contrast, for the Anodal group, occipito-parietal connectivity  
338 shows a significant decrease that correlates with OCT GABA+ decrease during our  
339 intervention (stimulation and training). The relationship between tDCS-induced changes in  
340 GABAergic inhibition and functional connectivity remains debated, with some studies  
341 showing a significant relationship (Antonenko et al., 2017), but some others not (e.g. (Bachtiar

342 et al., 2015)). Here, we show that anodal tDCS during training to detect targets in clutter results  
343 in accelerated GABA decrease in visual cortex that relates to reduced occipito-parietal  
344 connectivity, suggesting that anodal tDCS alters functional connectivity between sensory and  
345 decision-related areas.

346 Further, we show a significant negative correlation between intrinsic connectivity  
347 change and OCT GABA+ change during anodal but not sham stimulation (potentially due to  
348 the delayed GABA decrease in the Sham group). This relationship between changes in OCT  
349 GABA+ and local temporal coherence suggests that decreased GABAergic inhibition within  
350 visual cortex may facilitate signal detection by enhancing local processing. This result is  
351 consistent with our previous work showing higher intrinsic connectivity before training for  
352 greater GABA decrease during training (Frangou et al., 2019).

353 Previous work has shown that time-varying connectivity captures task and behavioural  
354 variability in addition to what is explained by static connectivity (Calhoun et al., 2014; Liégeois  
355 et al., 2019; Vidaurre et al., 2021). Here, we employ HMM to detect brain states of recurrent  
356 activity and connectivity patterns that have been linked to cognition (Karapanagiotidis et al.,  
357 2020; Vidaurre et al., 2017) and investigate learning-dependent plasticity at a finer timescale.  
358 We show that anodal stimulation alters inter-regional synchrony at both coarse (i.e. static  
359 functional connectivity over longer time periods, in the range of minutes) and finer timescales  
360 (i.e. functional changes within shorter time windows, in the range of seconds). In particular,  
361 we find decreased localised activity (occipito-parietal, early visual) after training with anodal  
362 stimulation, consistent with the decreased static occipito-parietal connectivity. In contrast, we  
363 find increased widespread synchronised activation across the whole visual cortex after training  
364 with anodal stimulation. Widespread synchronised activity has been linked to integration of  
365 information (Varela et al., 2001) and higher sensitivity in error detection (Breakspear et al.,  
366 2003). These processes are key for our signal-in-noise task that involves integrating



367 information across space, detecting the relevant features (i.e. signal) and suppressing irrelevant  
368 information (i.e. noise).

369 Finally, despite the wide interest that tDCS has attracted in cognitive and clinical  
370 neuroscience, its validity remains debated and our understanding of the tDCS mechanisms of  
371 action remains limited (Fertonani and Miniussi, 2017). Here we address this challenge by  
372 combining tDCS with brain imaging to interrogate the brain mechanisms that underlie the  
373 facilitatory effect of tDCS on learning and brain plasticity. Our findings dissociate faster vs.  
374 slower learning mechanisms and provide evidence for GABAergic plasticity mechanisms  
375 across stages of learning. In particular, we demonstrate that tDCS results in faster learning to  
376 detect targets in clutter by accelerating GABAergic plasticity (i.e. reducing GABAergic  
377 inhibition) and decreasing occipito-parietal connectivity. Our findings propose that brain  
378 stimulation during training optimises sensory processing through local gain control  
379 mechanisms (i.e. reduction of GABAergic inhibition) (Katzner et al., 2011) to support  
380 improved perceptual decisions (i.e. detecting targets in cluttered scenes).

381

## 382 **Materials and Methods**

### 383 **Participants**

384 We tested forty-five healthy volunteers (27 female; mean age  $22.9 \pm 3.3$  years) in two  
385 intervention groups, twenty-four in the stimulation group (Anodal) and twenty-one in the no-  
386 stimulation group (Sham). We tested an additional no-intervention group of twenty-two healthy  
387 volunteers who did not receive training nor stimulation (Control: 17 female; mean age  $25.8 \pm$   
388  $4.2$  years). All participants were right-handed, had normal or corrected-to-normal vision, did  
389 not receive any prescription medication, were naïve to the aim of the study, gave written  
390 informed consent and received payment for their participation. The study was approved by the  
391 University of Cambridge Ethics Committee [PRE.2017.057].

## 392 **Stimuli**

393 We presented participants with Glass patterns (Glass, 1969) generated using previously  
394 described methods ((Zhang et al., 2010); Figure 1a). In particular, stimuli were defined by  
395 white dot pairs (dipoles) displayed within a square aperture on a black background. Stimuli  
396 (size= $7.9^\circ \times 7.9^\circ$ ), were presented in the left hemifield (11.6 arc min from fixation) contralateral  
397 to the stimulation site to ensure maximal effect of stimulation on stimulus processing. The dot  
398 density was 3%, and the Glass shift (i.e., the distance between two dots in a dipole) was 16.2  
399 arc min. The size of each dot was  $2.3 \times 2.3$  arc min<sup>2</sup>. For each dot dipole, the spiral angle was  
400 defined as the angle between the dot dipole orientation and the radius from the centre of the  
401 dipole to the centre of the stimulus aperture. Each stimulus comprised dot dipoles that were  
402 aligned according to the specified spiral angle (signal dipoles) for a given stimulus and noise  
403 dipoles for which the spiral angle was randomly selected. The proportion of signal dipoles  
404 defined the stimulus signal level.

405 We generated radial ( $0^\circ$  spiral angle) and concentric ( $90^\circ$  spiral angle) Glass patterns by  
406 placing dipoles orthogonally (radial stimuli) or tangentially (concentric stimuli) to the  
407 circumference of a circle centred on the fixation dot. A new pattern was generated for each  
408 stimulus presented in a trial, resulting in stimuli that were locally jittered in their position.  
409 Radial (spiral angle:  $0^\circ$ ) and concentric stimuli (spiral angle:  $\pm 90^\circ$ ) were presented at 23% or  
410 25% signal level counterbalanced across trials; noise dipoles were presented at random position  
411 and orientation. To control for potential local adaptation due to stimulus repetition and ensure  
412 that learning related to global shape rather than local stimulus features, we jittered ( $\pm 1-3^\circ$ ) the  
413 spiral angle across stimuli.

414

## 415 **Experimental Design**

416 All participants in the intervention groups took part in a single brain imaging session during  
417 which they were randomly assigned to the Anodal or Sham group. Participants in the Anodal  
418 group received anodal tDCS on the right OCT, whereas participants in the Sham group did not  
419 receive stimulation. We recorded three MRS measurements from the right OCT during  
420 training: before, during and after stimulation. In addition, we recorded whole-brain rs-fMRI  
421 data before and after training while participants fixated on a cross at the centre of the screen  
422 (Figure 1b). Participants in the no-intervention Control group took part in a single brain  
423 imaging session without stimulation or training; we recorded three MRS measurements from  
424 right OCT at the same timings of the MRS measurements as for the intervention groups. We  
425 did not record rs-fMRI data for this group due to time constraints.

426 During training, participants in the intervention groups were presented with Glass  
427 patterns and were asked to judge and indicate by button press whether the presented stimulus  
428 in each trial was radial or concentric. Two stimulus conditions (radial vs. concentric Glass  
429 patterns; 100 trials per condition), were presented for each training block. For each trial, a  
430 stimulus was presented for 300ms and was followed by fixation (i.e., blank screen with a central  
431 fixation dot) while waiting for the participant's response (self-paced training paradigm). Trial-  
432 by-trial feedback was provided by means of a visual cue (green tick for correct, red 'x' for  
433 incorrect) followed by a fixation dot for 500ms before the onset of the next trial.

434 In the no-intervention control group, participants were tested in a contrast change  
435 detection task. In particular, participants were presented with Glass patterns where 100% of the  
436 dipoles were randomly oriented (0% signal patterns). In each trial, participants were asked to  
437 choose whether the top or bottom half of the pattern underwent a contrast change. Task  
438 difficulty was controlled by a two-up-one-down staircase to ensure participants were not  
439 trained at the task and response accuracy was held at 75%.

440 **MRI data acquisition**

441 We collected MRI data on a 3T Siemens PRISMA scanner (Cognition and Brain Sciences Unit,  
442 Cambridge) using a 64-channel head coil. T1-weighted structural data (TR = 19.17s; TE =  
443 2.31ms; number of slices = 176; voxel size = 1mm isotropic) and echo-planar imaging (EPI)  
444 data (gradient echo-pulse sequences) were acquired during rest (TR = 0.727s; TE = 34.6ms;  
445 number of slices = 72; voxel size = 2mm isotropic; Multi-band factor = 8; flip angle = 51°;  
446 number of volumes = 660; duration = 8m09s; whole brain coverage). During EPI data  
447 acquisition, we recorded cardiac pulsation (using a pulse oximeter) and respiration (using a  
448 respiratory belt) to model these physiological data for denoising.

449

450 **MRS data acquisition**

451 We collected MRS data with a MEGA-PRESS sequence (Mescher et al., 1998): echo  
452 time = 68ms, repetition time = 3000ms; 256 transients of 2048 data points were acquired in  
453 13min experiment time; a 14.28ms Gaussian editing pulse was applied at 1.9 (ON) and 7.5  
454 (OFF) ppm; water unsuppressed 16 transients (Table S6, following guidelines by (Lin et al.,  
455 2021)). Measurements with this sequence at 3T have been previously shown to produce reliable  
456 and reproducible estimates of GABA+ (Puts and Edden, 2012). Water suppression was  
457 achieved using variable power with optimized relaxation delays and outer volume suppression.  
458 Automated shimming was conducted to achieve water linewidth below 10Hz. We acquired  
459 spectra from an MRS voxel (20 x 20 x 25 mm<sup>3</sup>) in the right OCT (Figure 3). We manually  
460 positioned the MRS voxel using anatomical landmarks (superior temporal gyrus, middle  
461 occipital gyrus) on each participant's structural scan, ensuring that voxel placement was  
462 consistent across participants. The centre of gravity for the MRS voxel was: x=40.8±3.2mm,  
463 y=-61.7±5.2mm, z=10.6±3.6mm in Montreal Neurological Institute (MNI) space. During the

464 MRS acquisitions, participants in the intervention groups performed the SN task, while  
465 participants in the no-intervention control group performed the contrast change detection task.

466

#### 467 **tDCS data acquisition**

468 We used a multi-channel transcranial electrical stimulator (neuroConn DC-STIMULATOR  
469 MC, Ilmenau, Germany) to deliver anodal or sham stimulation. We used a pair of MR-  
470 compatible rubber electrodes (3x3 cm<sup>2</sup> stimulating electrode, 5x5 cm<sup>2</sup> reference electrode),  
471 which were secured on the head with the help of rubber bands. Ten-20 paste was used as a  
472 conductive medium between the rubber electrodes and the scalp. For the Anodal group, 1mA  
473 current was ramped up over 10s, was held at 1mA for 20min and was subsequently ramped  
474 down over 10s. For the Sham group, the current ramped up (10s) and down (10s) in the  
475 beginning of the session. We used online stimulation (i.e. stimulation during training), as this  
476 protocol has been previously shown to enhance the lasting effect of training (O'Shea et al.,  
477 2017). It has been shown that this facilitatory effect is not present or polarity-specific when  
478 stimulation precedes training, with anodal stimulation impeding learning (Stagg et al., 2011).  
479 To achieve consistent electrode placement across participants when targeting the right posterior  
480 OCT (consistent with the MRS acquisition in the right OCT), we placed the bottom right corner  
481 of the square stimulating electrode on T6, using a 10-20 system EEG cap, maintaining the same  
482 orientation across participants, parallel to the line connecting T6 and O2. The reference  
483 electrode was placed on Cz. We have previously used the same electrode montage (Frangou et  
484 al, 2018), following electrical field density simulations showing that this montage results in  
485 unilaterally localised current density, the peak of the electric field density being under the  
486 anode electrode around the posterior OCT and the stimulation reaching the region where the  
487 MRS voxel was placed.

488

## 489 **Behavioural data analysis**

490 We measured behavioural performance per training block as the mean accuracy per 200 trials.  
491 To quantify learning-dependent changes in behaviour, we computed the behavioural  
492 performance before, during and after stimulation as the average performance of blocks 1-2  
493 (Pre), 3-5 (During) and 6-9 (Post), respectively. Further, we quantified learning rate by fitting  
494 individual participant training data with a logarithmic function:  $y = k * \ln x + c$ , where  $x$  is the  
495 training run separated into 100 trial bins,  $y$  is the run accuracy,  $c$  is the starting performance  
496 and  $k$  corresponds to the learning rate. Positive learning rate indicates that performance  
497 improved with training, whereas negative or close to zero learning rate indicates no behavioural  
498 improvement.

499

## 500 **MRS data analysis**

501 We pre-processed the MRS data using MRspa v1.5c ([www.cmrr.umn.edu/downloads/mrspa/](http://www.cmrr.umn.edu/downloads/mrspa/)).  
502 We applied Eddy current, frequency and phase correction before subtracting the average ON  
503 and OFF spectra, resulting in edited spectra. We used LC-Model (Provencher, 2001) to  
504 quantify metabolite concentrations by fitting simulated model spectra of  $\gamma$ -amino-butyric acid  
505 (GABA), Glu, Glutamine and NAA to the edited spectra (Figure 3b), setting the sptype  
506 parameter to mega-press-2. We refer to GABA concentration as GABA+, as MRS  
507 measurements of GABA with MEGA-PRESS include co-edited macromolecules (Mullins et  
508 al., 2014). We referenced metabolite concentrations to the concentration of water for our  
509 analyses and then validated our findings by referencing GABA+ to NAA to ensure our results  
510 were not driven by the chosen reference (Lunghi et al., 2015).

511 GABA+ measurements within 3 standard deviations from the mean across all groups  
512 and blocks (data for 1 participant of the Anodal group were excluded) and with Cramer-Rao  
513 lower bound (CRLB) values smaller than 15% (data for 2 participants of the Anodal group and

514 1 of the Sham group were excluded) were included in further steps of MRS related analyses.  
515 SNR was calculated as the amplitude of the NAA peak in the difference-spectrum divided by  
516 twice the root mean square of the residual signal (Provencher, 2001). We report average quality  
517 indices (CRLB, linewidth, SNR) per group and block (Table S1). To control for potential  
518 differences in data quality across participants and blocks, we performed control analyses that  
519 accounted for changes in linewidth and SNR (Table S2, Table S3). We did not include control  
520 analyses for changes in CRLB, as reductions in GABA concentration have been shown to be  
521 inherently linked to increases in CRLB (Emir et al., 2012; Kreis, 2016; Lunghi et al., 2015).

522 Further, we conducted whole brain tissue-type segmentation of the T1-weighted  
523 structural scan and calculated percentage of grey matter, white matter and cerebrospinal fluid  
524 (CSF) in the MRS voxel. To ensure that correlations with GABA+ were not driven by  
525 variability in tissue composition within the MRS voxel across participants, we conducted two  
526 control analyses (Table S2, Table S3): (a) regressed out the CSF percentage from the GABA+  
527 concentrations, (b) applied  $\alpha$ -correction on the GABA+ values to account for the difference in  
528 GABA+ between grey and white matter (Porges et al., 2017).

529

### 530 **rs-fMRI data analysis**

531 We pre-processed the structural and the rs-fMRI data in SPM12.4 (v7219;  
532 [www.fil.ion.ucl.ac.uk/spm/software/spm12/](http://www.fil.ion.ucl.ac.uk/spm/software/spm12/)) following the Human Connectome Project  
533 pipeline for multi-band data (Smith et al., 2013). In particular, we first coregistered (non-  
534 linearly) the T1w structural images (after brain extraction) to MNI space to ensure that all  
535 participant data were in the same stereotactic space for statistical analysis. We then (a)  
536 corrected the EPI data for susceptibility distortions (fieldmap correction) and any spatial  
537 misalignments between EPI volumes due to head movement (i.e. aligned each run to its single  
538 band reference image), (b) coregistered the second EPI run to the first (rigid body) to correct

539 any spatial misalignments between runs, (c) coregistered the first EPI run to the structural  
540 image (rigid body) and (d) normalised them to MNI space for subsequent statistical analyses  
541 (applying the deformation field of the structural images). Data were only resliced after MNI  
542 normalisation to minimise the number of interpolation steps. Following MNI normalisation,  
543 (e) data were skull-stripped, (f) spatially smoothed with a 4mm Gaussian kernel to improve the  
544 signal-to-noise ratio and the alignment between participant data (two times the voxel size;  
545 (Chen and Calhoun, 2018)), (g) wavelet despiked to remove any secondary motion artifacts  
546 (Patel et al., 2014) and (h) had linear drifts removed (linear detrending due to scanner noise).  
547 Slice-timing correction was not applied, following previous work on fast TR (sub-second)  
548 acquisition protocols (Smith et al., 2013). Data from 8 participants (2 anodal, 6 sham) were  
549 excluded from further analysis due to missing the second rs-fMRI run.

550         Next, we applied spatial group Independent Component Analysis (ICA) using the  
551 Group ICA fMRI Toolbox (GIFT v3.0b) (<http://mialab.mrn.org/software/gift/>) to identify and  
552 remove components of noise. PCA was applied for dimensionality reduction, first at the subject  
553 level, then at the group level. The Minimum Description Length criteria (Rissanen, 1978) were  
554 used to estimate the dimensionality and determine the number of independent components. The  
555 ICA estimation (Infomax) was run 20 times and the component stability was estimated using  
556 ICASSO (Himberg et al., 2004). Following recent work on back-reconstruction methods for  
557 ICA denoising at the group level (Du et al., 2016), we used Group Information Guided ICA  
558 (GIG-ICA) back-reconstruction to reconstruct subject-specific components from the group  
559 components. We visually inspected the results and identified noise components according to  
560 published procedures (Griffanti et al., 2017). Using consensus voting among 3 experts, we  
561 labelled 8 of the 31 components as noise that captured signal from veins, arteries, CSF  
562 pulsation, susceptibility and multi-band artefacts.



563 To clean the fMRI signals from signals related to motion and the noise components, we  
564 followed a soft clean-up ICA denoise approach (Griffanti et al., 2014). That is, we first  
565 regressed out the motion parameters (translation, rotation and their squares and derivatives;  
566 (Friston et al., 1996)) from each voxel and ICA component time course. Second, we estimated  
567 the contribution of every ICA component to each voxel's time course (multiple regression).  
568 Finally, we subtracted the unique contribution of the noise components from each voxel's time  
569 course to avoid removing any shared signal between neuronal and noise components.

570 Following ICA denoise, we performed a first-level analysis modelling the physiological  
571 data as nuisance variables. We used the TAPAS toolbox (Kasper et al., 2017) to create  
572 physiological covariates that model terms for RETROICOR (Glover et al., 2000), heart rate  
573 variability (Chang et al., 2009) and respiratory volume per time (Birn et al., 2008). Following  
574 previous work (Caballero-Gaudes and Reynolds, 2017), we selected a second-order model for  
575 both the cardiac and the respiratory signal (no interaction term) and zero delay for the heart  
576 rate variability and respiratory volume per time terms. Within the GLM, the data were high-  
577 pass filtered at 0.01Hz and treated for serial correlations using the FAST autoregressive model,  
578 as it has been shown to perform more accurate autocorrelation modelling for fast TR  
579 acquisitions (Corbin et al., 2018; Olszowy et al., 2019). The residual time course from the last  
580 step was used for all subsequent analyses.

581

## 582 **Static connectivity analysis**

583 We calculated extrinsic functional connectivity between OCT and IPS and intrinsic  
584 connectivity within OCT. First, we created masks for these two regions of interest (ROI). For  
585 OCT, we computed the overlap across participant MRS voxels and created a group MRS mask  
586 that included voxels present in at least 50% of the participants' MRS voxels. For IPS, we

587 created an equally sized cubic mask centred on the intraparietal cortex (centre at 34, -50, 42 in  
588 MNI space (Frangou et al., 2019), edge length = 20mm).

589 Then, for each participant and ROI, we computed the first eigenvariate across all grey  
590 matter voxels within the region to derive a single representative time course per ROI. We  
591 applied a 5th order Butterworth band-pass filter between 0.01 and 0.08 Hz on the eigenvariate  
592 time course, similar to previous studies (Cordes et al., 2001; Frangou et al., 2019; Murphy et  
593 al., 2013). Extrinsic functional connectivity was computed as the Pearson correlation of the  
594 OCT-IPS time courses. Similarly, intrinsic connectivity was computed as the Pearson  
595 correlation of each OCT voxel's time course to the eigenvariate time course and then averaged  
596 across voxels (Bachtiar et al., 2015; Frangou et al., 2019; Stagg et al., 2014; Van Dijk et al.,  
597 2010). We computed the change in rs-fMRI connectivity as the difference of the pre- from the  
598 post-intervention run (after Fisher z-transform) and tested for: (a) changes in extrinsic and  
599 intrinsic connectivity, (b) correlations of connectivity change with OCT GABA+ change, and  
600 (c) correlations of connectivity change with behaviour. For correlations with GABA+ and  
601 behaviour, we regressed out the pre-intervention connectivity from the difference to control for  
602 baseline differences across participants.

603

#### 604 **Time-varying connectivity analysis**

605 We estimated time-varying functional connectivity using the HMM-MAR toolbox (Vidaurre  
606 et al., 2018, 2017). In particular, we estimated a HMM on the visual cortex to detect brain states  
607 representing recurrent patterns of activity and connectivity over time. Using a Bayesian  
608 approach, the model learns a set of parameters for each state and the probability of their  
609 activation at each time point given the recorded data. Specifically, given an active state  $Z_t$  at  
610 time  $t$ , the recorded data sample  $X_t$  is described by a multivariate Gaussian distribution:

611  $P(X_t|Z_t = k) \sim N(\mu_k, \Sigma_k)$ . Each state has distinct mean and covariance parameters that  
612 capture each state's mean activation and functional connectivity.

613 To investigate the dynamics of the occipito-parietal (OCT-IPS) interactions with the  
614 rest of the visual cortex, we defined fourteen bilateral regions from the Probabilistic map of  
615 Visual Topography (Wang et al., 2015) (Table S4). We then computed the first eigenvariate  
616 across all voxels within each region to derive a single representative time course per ROI. We  
617 concatenated the time courses of all ROIs across participants and runs to estimate state  
618 distributions (i.e. the spatial parameters of the model) at the group level, whereas the  
619 probability of a state activation is still defined uniquely for each timepoint at the participant  
620 level (i.e. the temporal parameters of the model; (Vidaurre et al., 2016)).

621 Latent variable models (such as the HMM) can be sensitive to local minima or poor  
622 initialisation (Vidaurre et al., 2019). To ensure stability on the estimation of the HMM states,  
623 we ran the algorithm 10 times with 10 random initialisations for each iteration and selected the  
624 iteration with the lowest free energy for simplicity. Further, we tested whether the results were  
625 robust to variations of key hyperparameters: the number of states ranging from 4 to 10, and the  
626 input data dimensionality by varying the number of retained PCA dimensions to capture  
627 between 70% and 100% of the variance (in increments of 10%).

628 To describe the state dynamics, we computed two summary measures: FO per state, as  
629 the proportion of time spent in that state, and SR across states, as the frequency of switching  
630 between states. That is, a state with increased (decreased) FO after training indicates that  
631 regions within that state are more (less) involved in the processing of the task, suggesting a  
632 higher (lower) engagement of that state after training. Similarly, increased SR after training  
633 indicates faster switching from one state to another over time, suggesting shorter processing  
634 times within a state after training. Finally, we computed change in FO and SR as the difference  
635 of the pre- from the post-intervention rs-fMRI run and tested for within-group changes.

636 **Statistical analysis**

637 For ANOVAs, we tested for sphericity and used Greenhouse-Geisser (for epsilon less than  
638 0.75) or Huynh-Feldt (for epsilon greater than 0.75) correction, if sphericity was violated. For  
639 correlational analyses, we used skipped Pearson correlation of the Robust Correlation Toolbox  
640 to account for bivariate outliers and adjusted the degrees of freedom when outliers were  
641 detected (Pernet et al., 2013).

642

643 **Funding**

644 This work was supported by grants to ZK from the Biotechnology and Biological Sciences  
645 Research Council (H012508, BB/P021255/1), the Wellcome Trust (205067/Z/16/Z) and the  
646 European Community's Seventh Framework Programme (FP7/2007-2013) under agreement  
647 PITN-GA-2011-290011. For the purpose of open access, the author has applied for a CC BY  
648 public copyright licence to any Author Accepted Manuscript version arising from this  
649 submission.

650

651 **Acknowledgements**

652 We would like to thank the MR physics and radiographer teams at the Cognition and Brain  
653 Sciences Unit for their support with data collection, and Matthew Davis and Benedikt Zoefel  
654 for their guidance on setting up tDCS in the scanner. We would like to thank Vicki Hodgson  
655 for help with data collection and Joseph Giorgio for his help with reviewing the ICA  
656 components.

657 **References**

- 658 Antal A, Kincses TZ, Nitsche MA, Bartfai O, Paulus W. 2004a. Excitability Changes  
659 Induced in the Human Primary Visual Cortex by Transcranial Direct Current  
660 Stimulation: Direct Electrophysiological Evidence. *Investig Ophthalmology Vis Sci*  
661 **45**:702. doi:10.1167/iovs.03-0688
- 662 Antal A, Nitsche MA, Kruse W, Kincses TZ, Hoffmann K-P, Paulus W. 2004b. Direct  
663 Current Stimulation over V5 Enhances Visuomotor Coordination by Improving Motion  
664 Perception in Humans. *J Cogn Neurosci* **16**:521–527.  
665 doi:10.1162/089892904323057263
- 666 Antonenko D, Schubert F, Bohm F, Ittermann B, Aydin S, Hayek D, Grittner U, Flöel A.  
667 2017. tDCS-Induced Modulation of GABA Levels and Resting-State Functional  
668 Connectivity in Older Adults. *J Neurosci* **37**:4065–4073.  
669 doi:10.1523/JNEUROSCI.0079-17.2017
- 670 Bachtiar V, Near J, Johansen-Berg H, Stagg CJ. 2015. Modulation of GABA and resting state  
671 functional connectivity by transcranial direct current stimulation. *Elife* **4**:1–9.  
672 doi:10.7554/eLife.08789
- 673 Barron HC, Vogels TP, Emir UE, Makin TR, O’Shea J, Clare S, Jbabdi S, Dolan RJ, Behrens  
674 TEJ. 2016. Unmasking Latent Inhibitory Connections in Human Cortex to Reveal  
675 Dormant Cortical Memories. *Neuron*. doi:10.1016/j.neuron.2016.02.031
- 676 Battaglini L, Noventa S, Casco C. 2017. Anodal and cathodal electrical stimulation over V5  
677 improves motion perception by signal enhancement and noise reduction. *Brain Stimul*  
678 **10**:773–779. doi:10.1016/j.brs.2017.04.128
- 679 Birn RM, Smith MA, Jones TB, Bandettini PA. 2008. The respiration response function: The  
680 temporal dynamics of fMRI signal fluctuations related to changes in respiration.  
681 *Neuroimage* **40**:644–654. doi:10.1016/j.neuroimage.2007.11.059

- 682 Breakspear M, Terry JR, Friston KJ. 2003. Modulation of excitatory synaptic coupling  
683 facilitates synchronization and complex dynamics in a biophysical model of neuronal  
684 dynamics. *Netw Comput Neural Syst* **14**:703–732. doi:10.1088/0954-898X\_14\_4\_305
- 685 Caballero-Gaudes C, Reynolds RC. 2017. Methods for cleaning the BOLD fMRI signal.  
686 *Neuroimage* **154**:128–149. doi:10.1016/j.neuroimage.2016.12.018
- 687 Calhoun VD, Miller R, Pearlson G, Adali T. 2014. The Chronnectome: Time-Varying  
688 Connectivity Networks as the Next Frontier in fMRI Data Discovery. *Neuron* **84**:262–  
689 274. doi:10.1016/j.neuron.2014.10.015
- 690 Callan DE, Falcone B, Wada A, Parasuraman R. 2016. Simultaneous tDCS-fMRI identifies  
691 resting state networks correlated with visual search enhancement. *Front Hum Neurosci*  
692 **10**:1–12. doi:10.3389/fnhum.2016.00072
- 693 Cao J, Liu H. 2018. Modulating the resting-state functional connectivity patterns of language  
694 processing areas in the human brain with anodal transcranial direct current stimulation  
695 applied over the Broca’s area. *Neurophotonics* **5**:1. doi:10.1117/1.nph.5.2.025002
- 696 Chang C, Cunningham JP, Glover GH. 2009. Influence of heart rate on the BOLD signal:  
697 The cardiac response function. *Neuroimage* **44**:857–869.  
698 doi:10.1016/j.neuroimage.2008.09.029
- 699 Chang DHF, Mevorach C, Kourtzi Z, Welchman AE. 2014. Training transfers the limits on  
700 perception from parietal to ventral cortex. *Curr Biol*. doi:10.1016/j.cub.2014.08.058
- 701 Chen Z, Calhoun V. 2018. Effect of Spatial Smoothing on Task fMRI ICA and Functional  
702 Connectivity. *Front Neurosci* **12**:15. doi:10.3389/fnins.2018.00015
- 703 Cohen JR. 2017. The behavioral and cognitive relevance of time-varying, dynamic changes  
704 in functional connectivity. *Neuroimage* 1–11. doi:10.1016/j.neuroimage.2017.09.036
- 705 Corbin N, Todd N, Friston KJ, Callaghan MF. 2018. Accurate modeling of temporal  
706 correlations in rapidly sampled fMRI time series. *Hum Brain Mapp* **39**:3884–3897.

- 707       doi:10.1002/hbm.24218
- 708   Cordes D, Haughton VM, Arfanakis K, Carew JD, Turski PA, Moritz CH, Quigley MA,  
709       Meyerand ME. 2001. Frequencies contributing to functional connectivity in the cerebral  
710       cortex in “resting-state” data. *Am J Neuroradiol* **22**:1326–1333.
- 711   Du Y, Allen EA, He H, Sui J, Wu L, Calhoun VD. 2016. Artifact removal in the context of  
712       group ICA: A comparison of single-subject and group approaches. *Hum Brain Mapp*  
713       **37**:1005–1025. doi:10.1002/hbm.23086
- 714   Eichenbaum A, Pappas I, Lurie D, Cohen JR, D’Esposito M. 2021. Differential contributions  
715       of static and time-varying functional connectivity to human behavior. *Netw Neurosci*  
716       **5**:145–165. doi:10.1162/netn\_a\_00172
- 717   Emir UE, Tuite PJ, Öz G. 2012. Elevated pontine and putamenal gaba levels in mild-  
718       moderate parkinson disease detected by 7 tesla proton mrs. *PLoS One*.  
719       doi:10.1371/journal.pone.0030918
- 720   Fertonani A, Miniussi C. 2017. Transcranial Electrical Stimulation. *Neurosci* **23**:109–123.  
721       doi:10.1177/1073858416631966
- 722   Frangou P, Correia M, Kourtzi Z. 2018. GABA, not BOLD, reveals dissociable learning-  
723       dependent plasticity mechanisms in the human brain. *Elife* **7**:1–22.  
724       doi:10.7554/eLife.35854
- 725   Frangou P, Emir UE, Karlaftis VM, Nettekoven C, Hinson EL, Larcombe S, Bridge H, Stagg  
726       CJ, Kourtzi Z. 2019. Learning to optimize perceptual decisions through suppressive  
727       interactions in the human brain. *Nat Commun* 2019 101 **10**:474. doi:10.1038/s41467-  
728       019-08313-y
- 729   Friston KJ, Williams S, Howard R, Frackowiak RSJ, Turner R. 1996. Movement-Related  
730       effects in fMRI time-series. *Magn Reson Med* **35**:346–355.  
731       doi:10.1002/mrm.1910350312

- 732 Glass L. 1969. Moiré effect from random dots. *Nature*. doi:10.1038/223578a0
- 733 Glover GH, Li T, Ress D. 2000. Image-based method for retrospective correction of  
734 physiological motion effects in fMRI: RETROICOR. *Magn Reson Med* **44**:162–167.  
735 doi:10.1002/1522-2594(200007)44:1<162::aid-mrm23>3.3.co;2-5
- 736 Griffanti L, Douaud G, Bijsterbosch J, Evangelisti S, Alfaro-Almagro F, Glasser MF, Duff  
737 EP, Fitzgibbon S, Westphal R, Carone D, Beckmann CF, Smith SM. 2017. Hand  
738 classification of fMRI ICA noise components. *Neuroimage* **154**:188–205.  
739 doi:10.1016/j.neuroimage.2016.12.036
- 740 Griffanti L, Salimi-Khorshidi G, Beckmann CF, Auerbach EJ, Douaud G, Sexton CE,  
741 Zsoldos E, Ebmeier KP, Filippini N, Mackay CE, Moeller S, Xu J, Yacoub E, Baselli G,  
742 Ugurbil K, Miller KL, Smith SM. 2014. ICA-based artefact removal and accelerated  
743 fMRI acquisition for improved resting state network imaging. *Neuroimage* **95**:232–247.  
744 doi:10.1016/j.neuroimage.2014.03.034
- 745 Guerra-Carrillo B, Mackey AP, Bunge SA. 2014. Resting-State fMRI: A Window into  
746 Human Brain Plasticity. *Neurosci* **20**:522–533. doi:10.1177/1073858414524442
- 747 Harris AD, Wang Z, Ficek B, Webster K, Edden RA, Tsapkini K. 2019. Reductions in  
748 GABA following a tDCS-language intervention for primary progressive aphasia.  
749 *Neurobiol Aging* **79**:75–82. doi:10.1016/j.neurobiolaging.2019.03.011
- 750 Himberg J, Hyvärinen A, Esposito F. 2004. Validating the independent components of  
751 neuroimaging time series via clustering and visualization. *Neuroimage* **22**:1214–1222.  
752 doi:10.1016/j.neuroimage.2004.03.027
- 753 Hutchison RM, Womelsdorf T, Allen EA, Bandettini PA, Calhoun VD, Corbetta M, Della  
754 Penna S, Duyn JH, Glover GH, Gonzalez-Castillo J, Handwerker DA, Keilholz S,  
755 Kiviniemi V, Leopold DA, de Pasquale F, Sporns O, Walter M, Chang C. 2013.  
756 Dynamic functional connectivity: Promise, issues, and interpretations. *Neuroimage*



- 757       **80**:360–378. doi:10.1016/j.neuroimage.2013.05.079
- 758 Ip IB, Bridge H. 2021. Investigating the neurochemistry of the human visual system using  
759       magnetic resonance spectroscopy. *Brain Struct Funct* **1**:3. doi:10.1007/s00429-021-  
760       02273-0
- 761 Kapogiannis D, Reiter DA, Willette AA, Mattson MP. 2013. Posteromedial cortex glutamate  
762       and GABA predict intrinsic functional connectivity of the default mode network.  
763       *Neuroimage*. doi:10.1016/j.neuroimage.2012.09.029
- 764 Karapanagiotidis T, Vidaurre D, Quinn AJ, Vatansever D, Poerio GL, Turnbull A, Ho NSP,  
765       Leech R, Bernhardt BC, Jefferies E, Margulies DS, Nichols TE, Woolrich MW,  
766       Smallwood J. 2020. The psychological correlates of distinct neural states occurring  
767       during wakeful rest. *Sci Rep* **10**:21121. doi:10.1038/s41598-020-77336-z
- 768 Karlaftis VM, Giorgio J, Vértes PE, Wang R, Shen Y, Tino P, Welchman AE, Kourtzi Z.  
769       2019. Multimodal imaging of brain connectivity reveals predictors of individual  
770       decision strategy in statistical learning. *Nat Hum Behav* **3**:297–307. doi:10.1038/s41562-  
771       018-0503-4
- 772 Karlaftis VM, Giorgio J, Zamboni E, Frangou P, Rideaux R, Ziminski JJ, Kourtzi Z. 2021.  
773       Functional Interactions between Sensory and Memory Networks for Adaptive Behavior.  
774       *Cereb Cortex* 1–12. doi:10.1093/cercor/bhab160
- 775 Kasper L, Bollmann S, Diaconescu AO, Hutton C, Heinzle J, Iglesias S, Hauser TU, Sebold  
776       M, Manjaly ZM, Pruessmann KP, Stephan KE. 2017. The PhysIO Toolbox for  
777       Modeling Physiological Noise in fMRI Data. *J Neurosci Methods* **276**:56–72.  
778       doi:10.1016/j.jneumeth.2016.10.019
- 779 Katzner S, Busse L, Carandini M. 2011. GABAA Inhibition Controls Response Gain in  
780       Visual Cortex. *J Neurosci* **31**:5931–5941. doi:10.1523/JNEUROSCI.5753-10.2011
- 781 Kelly C, Castellanos FX. 2014. Strengthening connections: Functional connectivity and brain

- 782 plasticity. *Neuropsychol Rev* **24**:63–76. doi:10.1007/s11065-014-9252-y
- 783 Kolasinski J, Hinson EL, Divanbeighi Zand AP, Rizov A, Emir UE, Stagg CJ. 2019. The  
784 dynamics of cortical GABA in human motor learning. *J Physiol*. doi:10.1113/JP276626
- 785 Krause MR, Zanos TP, Csorba BA, Pilly PK, Choe J, Phillips ME, Datta A, Pack CC. 2017.  
786 Transcranial Direct Current Stimulation Facilitates Associative Learning and Alters  
787 Functional Connectivity in the Primate Brain. *Curr Biol* **27**:3086-3096.e3.  
788 doi:10.1016/j.cub.2017.09.020
- 789 Kreis R. 2016. The trouble with quality filtering based on relative Cramér-Rao lower bounds.  
790 *Magn Reson Med* **75**:15–18. doi:10.1002/mrm.25568
- 791 Krishnamurthy V, Gopinath K, Brown GS, Hampstead BM. 2015. Resting-state fMRI reveals  
792 enhanced functional connectivity in spatial navigation networks after transcranial direct  
793 current stimulation. *Neurosci Lett* **604**:80–85. doi:10.1016/j.neulet.2015.07.042
- 794 Lewis CM, Baldassarre A, Committeri G, Romani GL, Corbetta M. 2009. Learning sculpts  
795 the spontaneous activity of the resting human brain. *Proc Natl Acad Sci* **106**:17558–  
796 17563. doi:10.1073/pnas.0902455106
- 797 Liégeois R, Li J, Kong R, Orban C, Van De Ville D, Ge T, Sabuncu MR, Yeo BTT. 2019.  
798 Resting brain dynamics at different timescales capture distinct aspects of human  
799 behavior. *Nat Commun* **10**:2317. doi:10.1038/s41467-019-10317-7
- 800 Lin A, Andronesi O, Bogner W, Choi I, Coello E, Cudalbu C, Juchem C, Kemp GJ, Kreis R,  
801 Krššák M, Lee P, Maudsley AA, Meyerspeer M, Mlynarik V, Near J, Öz G, Peek AL,  
802 Puts NA, Ratai E, Tkáč I, Mullins PG. 2021. Minimum Reporting Standards for in vivo  
803 Magnetic Resonance Spectroscopy (MRSinMRS): Experts’ consensus  
804 recommendations. *NMR Biomed* **34**:e4484. doi:10.1002/nbm.4484
- 805 Lunghi C, Emir UE, Morrone MC, Bridge H. 2015. Short-Term Monocular Deprivation  
806 Alters GABA in the Adult Human Visual Cortex. *Curr Biol* **25**:1496–1501.

- 807       doi:10.1016/j.cub.2015.04.021
- 808   Mann EO, Paulsen O. 2007. Role of GABAergic inhibition in hippocampal network  
809       oscillations. *Trends Neurosci* **30**:343–349. doi:10.1016/j.tins.2007.05.003
- 810   Mayhew SD, Li S, Kourtzi Z. 2012. Learning acts on distinct processes for visual form  
811       perception in the human brain. *J Neurosci*. doi:10.1523/JNEUROSCI.2033-11.2012
- 812   McDermott TJ, Wiesman AI, Mills MS, Spooner RK, Coolidge NM, Proskovec AL,  
813       Heinrichs-Graham E, Wilson TW. 2019. tDCS modulates behavioral performance and  
814       the neural oscillatory dynamics serving visual selective attention. *Hum Brain Mapp*  
815       **40**:729–740. doi:10.1002/hbm.24405
- 816   Meinzer M, Antonenko D, Lindenberg R, Hetzer S, Ulm L, Avirame K, Flaisch T, Flöel A.  
817       2012. Electrical brain stimulation improves cognitive performance by modulating  
818       functional connectivity and task-specific activation. *J Neurosci* **32**:1859–1866.  
819       doi:10.1523/JNEUROSCI.4812-11.2012
- 820   Mescher M, Merkle H, Kirsch J, Garwood M, Gruetter R. 1998. Simultaneous in vivo  
821       spectral editing and water suppression. *NMR Biomed* **11**:266–272.  
822       doi:10.1002/(SICI)1099-1492(199810)11:6<266::AID-NBM530>3.0.CO;2-J
- 823   Mullins PG, McGonigle DJ, O’Gorman RL, Puts NAJ, Vidyasagar R, Evans CJ, Edden RAE.  
824       2014. Current practice in the use of MEGA-PRESS spectroscopy for the detection of  
825       GABA. *Neuroimage* **86**:43–52. doi:10.1016/j.neuroimage.2012.12.004
- 826   Murphy K, Birn RM, Bandettini PA. 2013. Resting-state fMRI confounds and cleanup.  
827       *Neuroimage* **80**:349–359. doi:10.1016/j.neuroimage.2013.04.001
- 828   Nasrallah FA, Singh KKD /O. R, Yeow LY, Chuang K-H. 2017. GABAergic effect on  
829       resting-state functional connectivity: Dynamics under pharmacological antagonism.  
830       *Neuroimage* **149**:53–62. doi:10.1016/j.neuroimage.2017.01.040
- 831   Nitsche MA, Paulus W. 2000. Excitability changes induced in the human motor cortex by

- 832 weak transcranial direct current stimulation. *J Physiol*. doi:10.1111/j.1469-  
833 7793.2000.t01-1-00633.x
- 834 O'Shea J, Revol P, Cousijn H, Near J, Petitet P, Jacquin-Courtois S, Berg HJ, Rode G,  
835 Rossetti Y. 2017. Induced sensorimotor cortex plasticity remediates chronic treatment-  
836 resistant visual neglect. *Elife*. doi:10.7554/eLife.26602
- 837 Olszowy W, Aston J, Rua C, Williams GB. 2019. Accurate autocorrelation modeling  
838 substantially improves fMRI reliability. *Nat Commun* **10**:1–12. doi:10.1038/s41467-  
839 019-09230-w
- 840 Patel AX, Kundu P, Rubinov M, Jones PS, Vértes PE, Ersche KD, Suckling J, Bullmore ET.  
841 2014. A wavelet method for modeling and despiking motion artifacts from resting-state  
842 fMRI time series. *Neuroimage* **95**:287–304. doi:10.1016/j.neuroimage.2014.03.012
- 843 Pernet CR, Wilcox R, Rousselet GA. 2013. Robust Correlation Analyses: False Positive and  
844 Power Validation Using a New Open Source Matlab Toolbox. *Front Psychol* **3**.  
845 doi:10.3389/fpsyg.2012.00606
- 846 Porges EC, Woods AJ, Lamb DG, Williamson JB, Cohen RA, Edden RAE, Harris AD. 2017.  
847 Impact of tissue correction strategy on GABA-edited MRS findings. *Neuroimage*  
848 **162**:249–256. doi:10.1016/j.neuroimage.2017.08.073
- 849 Preti MG, Bolton TA, Van De Ville D. 2017. The dynamic functional connectome: State-of-  
850 the-art and perspectives. *Neuroimage* **160**:41–54. doi:10.1016/j.neuroimage.2016.12.061
- 851 Provencher SW. 2001. Automatic quantitation of localized in vivo <sup>1</sup>H spectra with LCModel.  
852 *NMR Biomed* **14**:260–264. doi:10.1002/nbm.698
- 853 Puts NAJ, Edden RAE. 2012. In vivo magnetic resonance spectroscopy of GABA: A  
854 methodological review. *Prog Nucl Magn Reson Spectrosc* **60**:29–41.  
855 doi:10.1016/j.pnmrs.2011.06.001
- 856 Rissanen J. 1978. Modeling by shortest data description. *Automatica* **14**:465–471.

- 857       doi:10.1016/0005-1098(78)90005-5
- 858   Sampaio-Baptista C, Filippini N, Stagg CJ, Near J, Scholz J, Johansen-Berg H. 2015.
- 859       Changes in functional connectivity and GABA levels with long-term motor learning.
- 860       *Neuroimage*. doi:10.1016/j.neuroimage.2014.11.032
- 861   Sczesny-Kaiser M, Beckhaus K, Dinse HR, Schwenkreis P, Tegenthoff M, Höffken O. 2016.
- 862       Repetitive Transcranial Direct Current Stimulation Induced Excitability Changes of
- 863       Primary Visual Cortex and Visual Learning Effects—A Pilot Study. *Front Behav*
- 864       *Neurosci* **10**:116. doi:10.3389/fnbeh.2016.00116
- 865   Shibata K, Sasaki Y, Bang JW, Walsh EG, Machizawa MG, Tamaki M, Chang L-H,
- 866       Watanabe T. 2017. Overlearning hyperstabilizes a skill by rapidly making
- 867       neurochemical processing inhibitory-dominant. *Nat Neurosci* **20**:470–475.
- 868       doi:10.1038/nn.4490
- 869   Shmuel A, Leopold DA. 2008. Neuronal correlates of spontaneous fluctuations in fMRI
- 870       signals in monkey visual cortex: Implications for functional connectivity at rest. *Hum*
- 871       *Brain Mapp*. doi:10.1002/hbm.20580
- 872   Smith SM, Beckmann CF, Andersson J, Auerbach EJ, Bijsterbosch J, Douaud G, Duff E,
- 873       Feinberg DA, Griffanti L, Harms MP, Kelly M, Laumann T, Miller KL, Moeller S,
- 874       Petersen S, Power J, Salimi-Khorshidi G, Snyder AZ, Vu AT, Woolrich MW, Xu J,
- 875       Yacoub E, Ugurbil K, Van Essen DC, Glasser MF. 2013. Resting-state fMRI in the
- 876       Human Connectome Project. *Neuroimage* **80**:144–168.
- 877       doi:10.1016/j.neuroimage.2013.05.039
- 878   Spiegel DP, Byblow WD, Hess RF, Thompson B. 2013. Anodal Transcranial Direct Current
- 879       Stimulation Transiently Improves Contrast Sensitivity and Normalizes Visual Cortex
- 880       Activation in Individuals With Amblyopia. *Neurorehabil Neural Repair* **27**:760–769.
- 881       doi:10.1177/1545968313491006

- 882 Stagg CJ, Bachtiar V, Amadi U, Gudberg CA, Ilie AS, Sampaio-Baptista C, O’Shea J,  
883 Woolrich M, Smith SM, Filippini N, Near J, Johansen-Berg H. 2014. Local GABA  
884 concentration is related to network-level resting functional connectivity. *Elife* **3**:1–9.  
885 doi:10.7554/eLife.01465
- 886 Stagg CJ, Best JG, Stephenson MC, O’Shea J, Wylezinska M, Kineses ZT, Morris PG,  
887 Matthews PM, Johansen-Berg H. 2009. Polarity-sensitive modulation of cortical  
888 neurotransmitters by transcranial stimulation. *J Neurosci*.  
889 doi:10.1523/JNEUROSCI.4432-08.2009
- 890 Stagg CJ, Jayaram G, Pastor D, Kincses ZT, Matthews PM, Johansen-Berg H. 2011. Polarity  
891 and timing-dependent effects of transcranial direct current stimulation in explicit motor  
892 learning. *Neuropsychologia* **49**:800–804. doi:10.1016/j.neuropsychologia.2011.02.009
- 893 Van Dijk KR a, Hedden T, Venkataraman A, Evans KC, Lazar SW, Buckner RL. 2010.  
894 Intrinsic Functional Connectivity As a Tool For Human Connectomics: Theory,  
895 Properties, and Optimization. *J Neurophysiol* **103**:297–321. doi:10.1152/jn.00783.2009
- 896 Van Meel C, Daniels N, de Beeck HO, Baeck A. 2016. Effect of tDCS on task relevant and  
897 irrelevant perceptual learning of complex objects. *J Vis* **16**:13. doi:10.1167/16.6.13
- 898 Varela F, Lachaux JP, Rodriguez E, Martinerie J. 2001. The brainweb: Phase synchronization  
899 and large-scale integration. *Nat Rev Neurosci* **2**:229–239. doi:10.1038/35067550
- 900 Vidaurre D, Abeysuriya R, Becker R, Quinn AJ, Alfaro-Almagro F, Smith SM, Woolrich  
901 MW. 2018. Discovering dynamic brain networks from big data in rest and task.  
902 *Neuroimage* **180**:646–656. doi:10.1016/j.neuroimage.2017.06.077
- 903 Vidaurre D, Llera A, Smith SM, Woolrich MW. 2021. Behavioural relevance of spontaneous,  
904 transient brain network interactions in fMRI. *Neuroimage* **229**:117713.  
905 doi:10.1016/j.neuroimage.2020.117713
- 906 Vidaurre D, Quinn AJ, Baker AP, Dupret D, Tejero-Cantero A, Woolrich MW. 2016.

- 907 Spectrally resolved fast transient brain states in electrophysiological data. *Neuroimage*  
908 **126**:81–95. doi:10.1016/j.neuroimage.2015.11.047
- 909 Vidaurre D, Smith SM, Woolrich MW. 2017. Brain network dynamics are hierarchically  
910 organized in time. *Proc Natl Acad Sci* **114**:12827–12832. doi:10.1073/pnas.1705120114
- 911 Vidaurre D, Woolrich MW, Winkler AM, Karapanagiotidis T, Smallwood J, Nichols TE.  
912 2019. Stable between-subject statistical inference from unstable within-subject  
913 functional connectivity estimates. *Hum Brain Mapp* **40**:1234–1243.  
914 doi:10.1002/hbm.24442
- 915 Wang L, Mruczek REB, Arcaro MJ, Kastner S. 2015. Probabilistic Maps of Visual  
916 Topography in Human Cortex. *Cereb Cortex* **25**:3911–31. doi:10.1093/cercor/bhu277
- 917 Zhang J, Meeson A, Welchman AE, Kourtzi Z. 2010. Learning alters the tuning of functional  
918 magnetic resonance imaging patterns for visual forms. *J Neurosci*.  
919 doi:10.1523/JNEUROSCI.2204-10.2010
- 920 Zito G, Senti T, Cazzoli D, Müri R, Mosimann U, Nyffeler T, Nef T. 2015. Cathodal HD-  
921 tDCS on the right V5 improves motion perception in humans . *Front Behav Neurosci* .  
922

## Figures

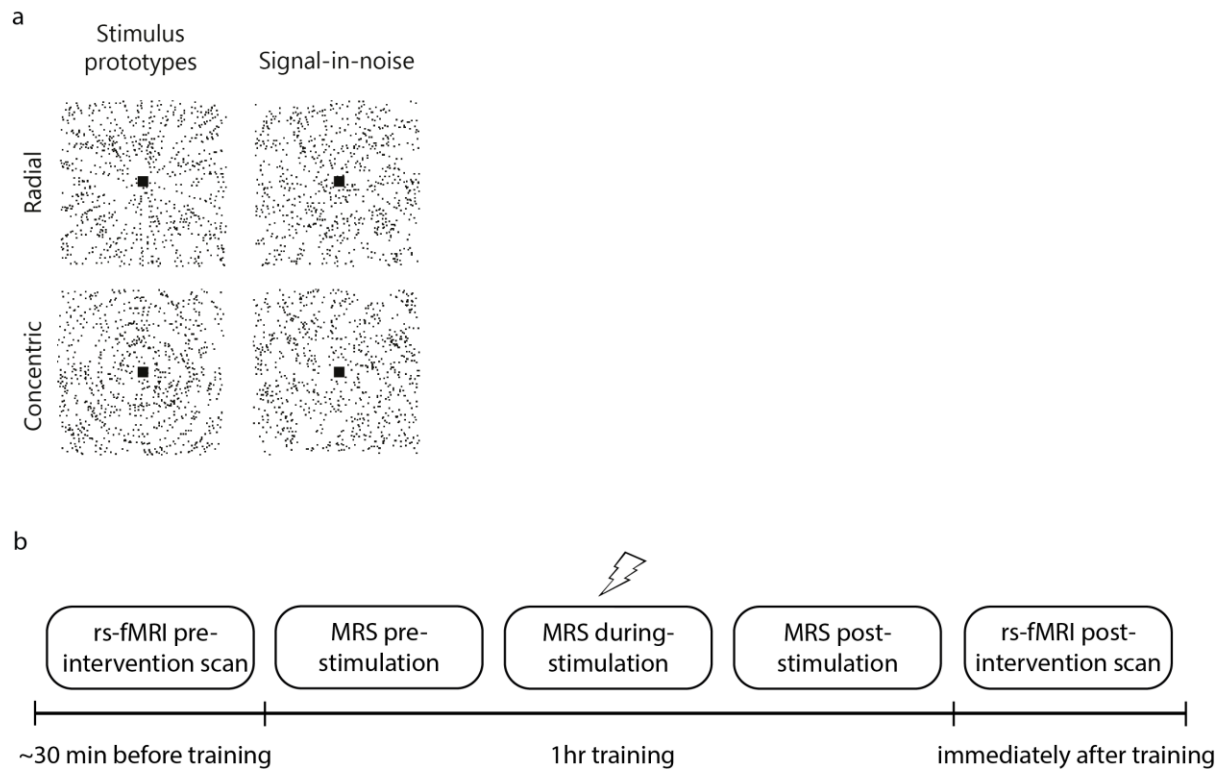

**Figure 1. Stimuli and experiment timeline:** (a) Example stimuli comprising radial and concentric Glass patterns (stimuli are presented with inverted contrast for illustration purposes). Stimuli are shown for the signal-in-noise task (25% signal, spiral angle  $0^\circ$  for radial and  $90^\circ$  for concentric). Prototype stimuli (100% signal, spiral angle  $0^\circ$  for radial and  $90^\circ$  for concentric) are shown for illustration purposes only. (b) Timeline of the experiment that comprises two rs-fMRI scans and three MRS measurements during training on the signal-in-noise task. tDCS was delivered during the second MRS acquisition for the intervention groups (Anodal, Sham).



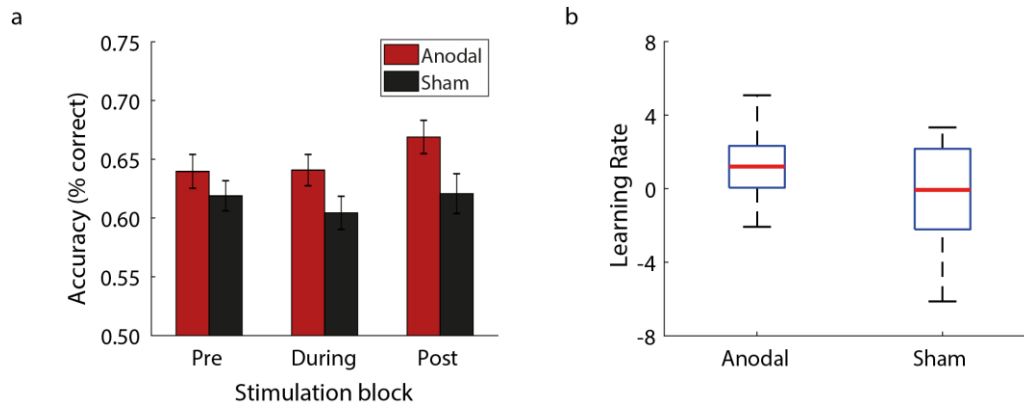

**Figure 2. Behavioural performance:** (a) Mean behavioural performance across participants per group (Anodal, Sham) and block (Pre, During, Post). Error bars indicate standard error of the mean across participants. (b) Boxplot of learning rate across training showing faster learning for Anodal than Sham group. The upper and lower error bars display the minimum and maximum data values, and the central box represents the interquartile range (25th–75th percentiles). The red line in the centre of the box represents the median.

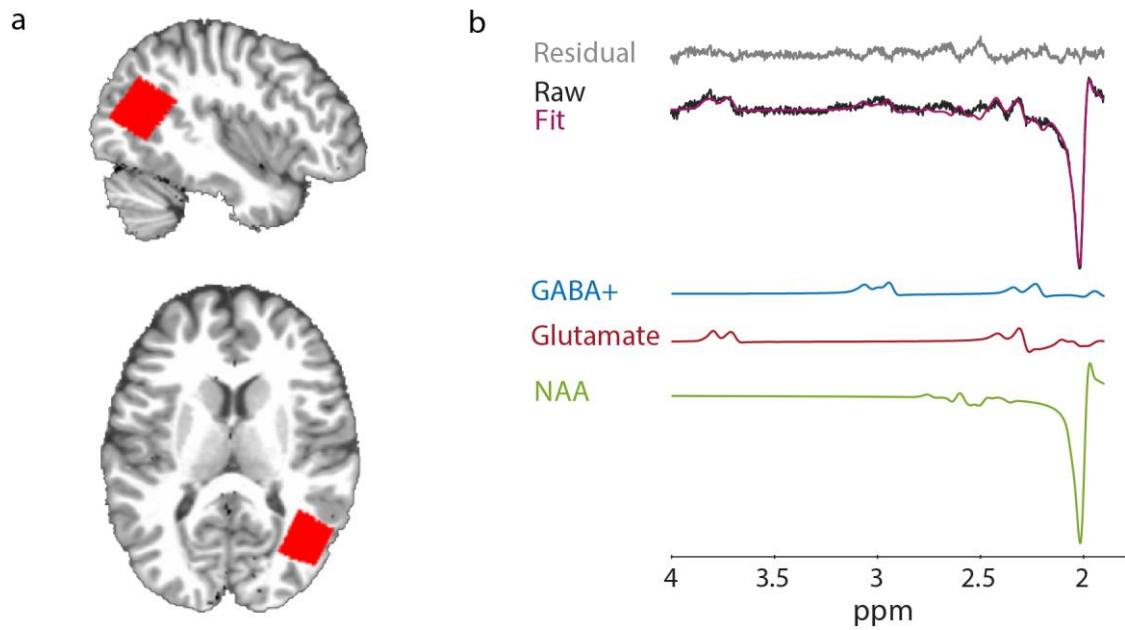

**Figure 3. MRS voxel placement and spectra:** (a) For each participant, we positioned the OCT MRS voxel using anatomical landmarks (superior temporal gyrus and middle occipital gyrus) on the acquired T1 scan to ensure that voxel placement was consistent across participants. Placement of the MRS voxel is shown for a representative participant (sagittal, axial view: native space). (b) Sample spectra from the MRS voxel of a representative participant. We show the LC model fit, the residual and the respective fits for GABA+, Glutamate and NAA.

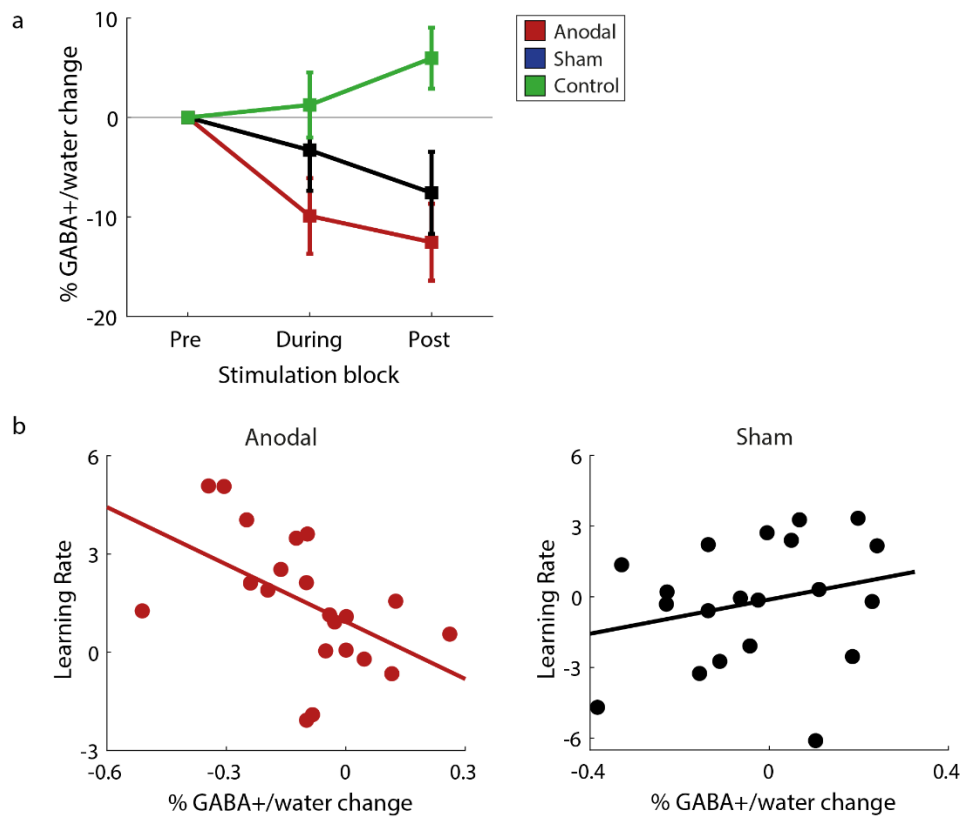

**Figure 4. GABA+ change during training and correlations with behaviour:** (a) OCT MRS-measured GABA+ over time is shown per group (Anodal, Sham, Control). We calculated % GABA+/water change by subtracting GABA+/water measurements in each of the three blocks from the pre-stimulation block and then divided by GABA+/water in the pre-stimulation block. (b) Skipped Pearson correlations showing a significant negative correlation of OCT GABA+ change (i.e. during- minus pre-stimulation block, divided by pre-stimulation block) with learning rate for the Anodal, but not the Sham group. These correlations were significantly different between groups.

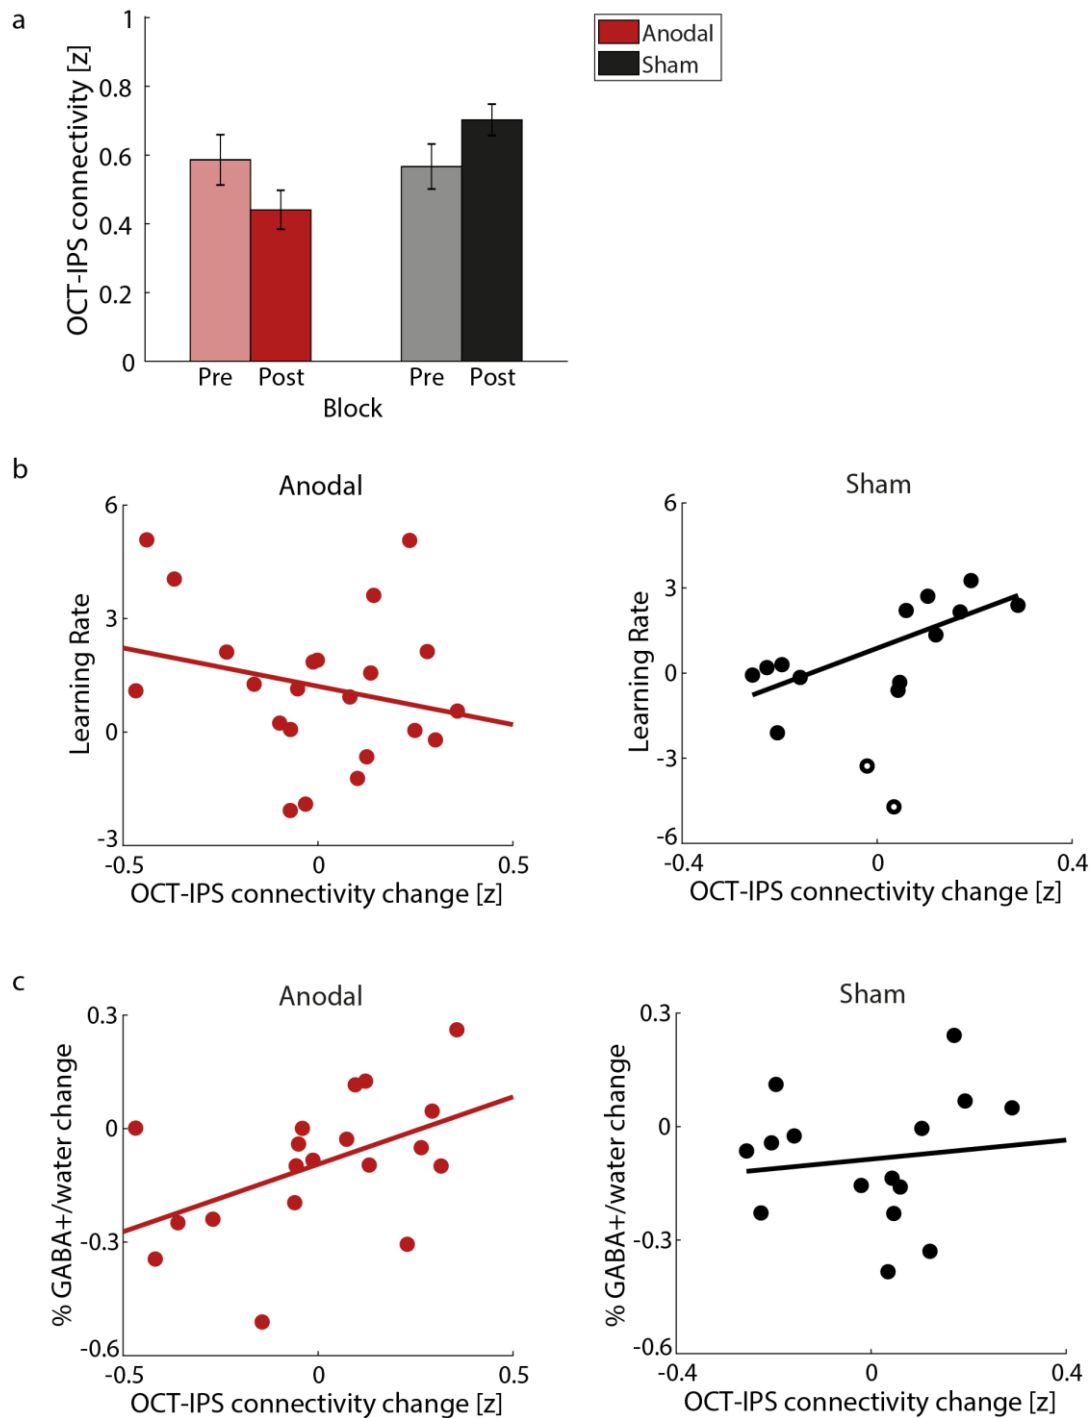

**Figure 5. Extrinsic connectivity and correlations with behaviour and GABA+:** (a) Mean OCT-IPS connectivity (Fisher z) per group (Anodal, Sham) and block (pre-, post-intervention). (b) Skipped Pearson correlations showing no significant correlation of OCT-IPS connectivity change with learning rate for the Anodal group, but a significant positive correlation for the Sham group. These correlations were significantly different between groups. (c) Skipped Pearson correlations showing a significant positive correlation of OCT-IPS connectivity change with OCT GABA+ change for the Anodal group, but not the Sham. Open symbols denote outliers.

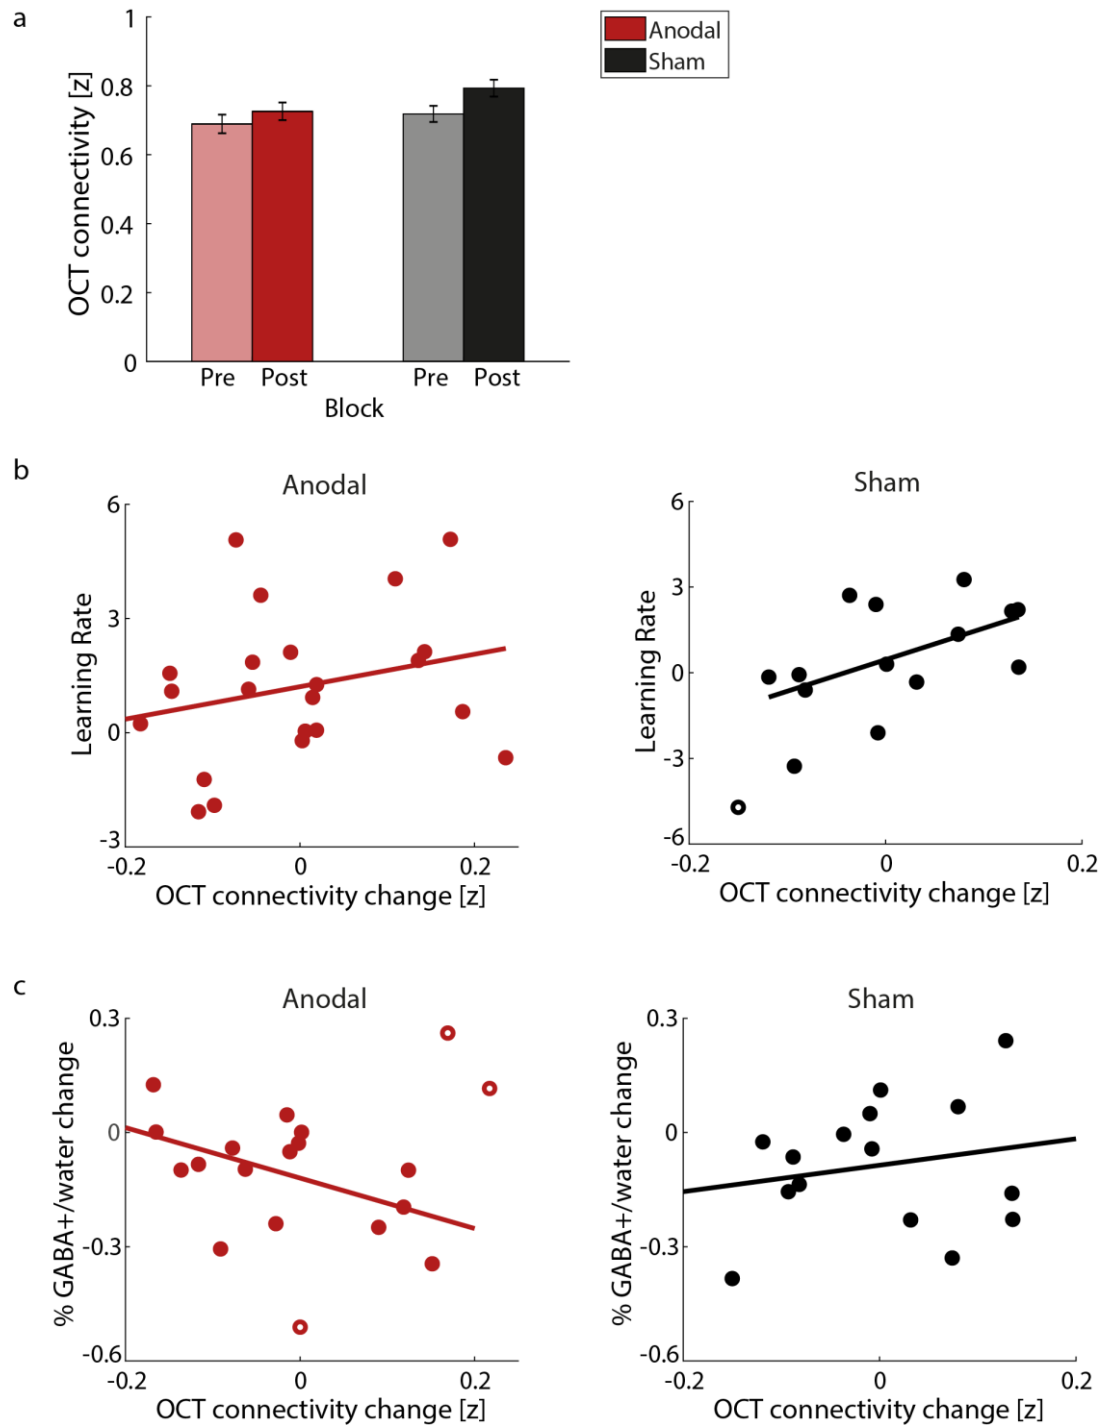

**Figure 6: Intrinsic connectivity and correlations with behaviour and GABA+:** (a) Mean intrinsic connectivity in OCT (Fisher z) per group (Anodal, Sham) and block (pre-, post-intervention). (b) Skipped Pearson correlations showing no significant correlation of OCT connectivity change with learning rate for the Anodal or the Sham group. (c) Skipped Pearson correlations showing a significant negative correlation of OCT connectivity change with OCT GABA+ change for the Anodal group, but not the Sham. Open symbols denote outliers.

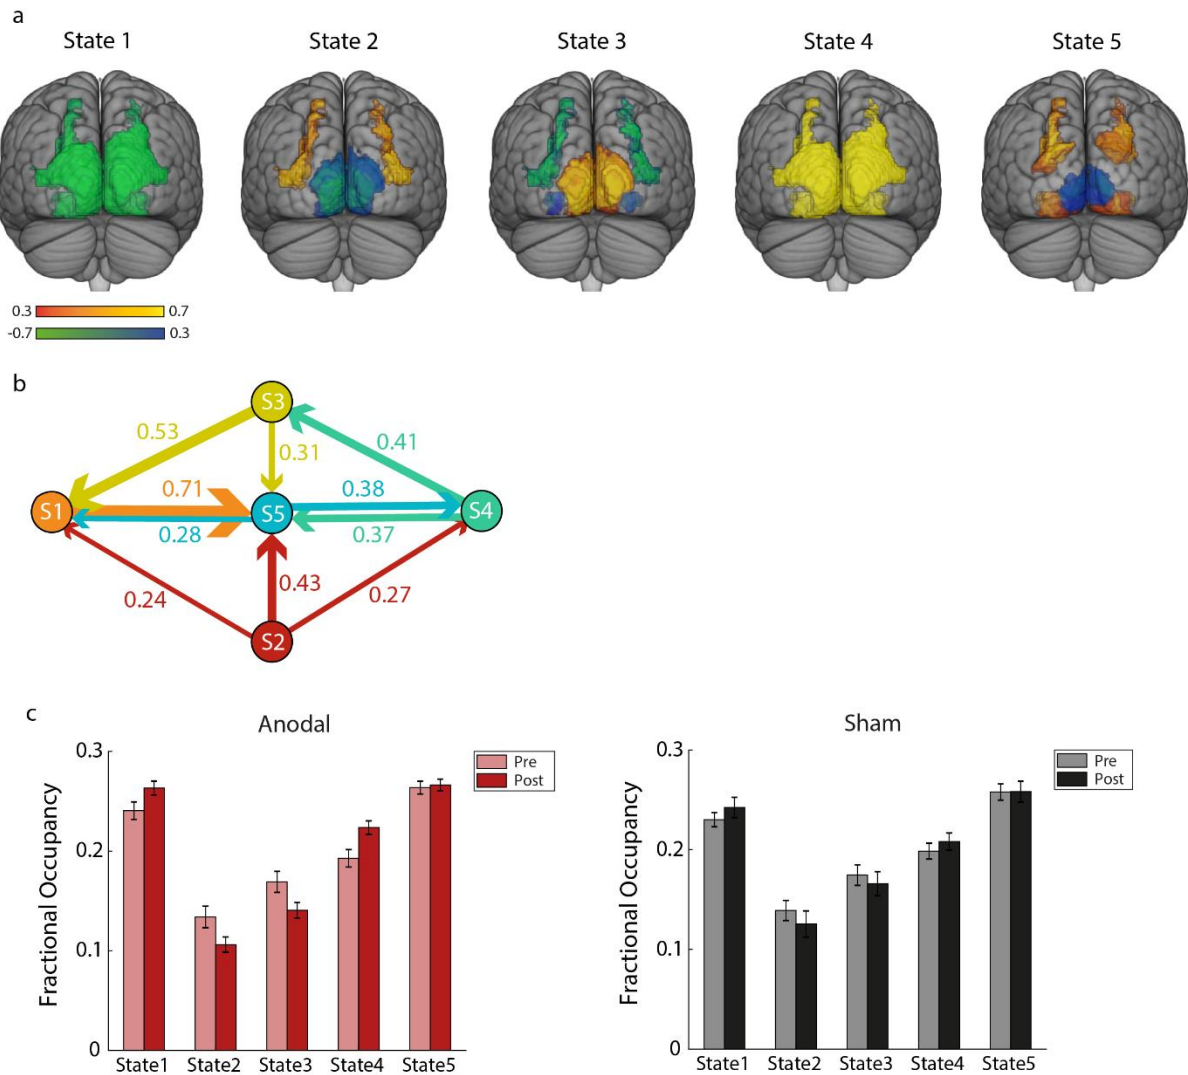

**Figure 7: HMM states and Fractional Occupancy change:** (a) Normalised mean activation maps per state are shown overlaid on the MNI brain. Warm colours (red-yellow) denote positive values, cool colours (blue-green) denote negative values for the respective region. (b) Transition probabilities between these states. The five states are displayed as nodes and the arrows denote the direction of the transition from one state to another. The thickness of the arrows is proportional to the transition probability between the corresponding states. Transition probabilities lower than 20% were removed for visualisation purposes. (c) Mean Fractional Occupancy per state and block (pre-, post-intervention) are shown for each group (Anodal: left, Sham: right). Lighter bars correspond to pre-training measures, darker bars to post-training measures.

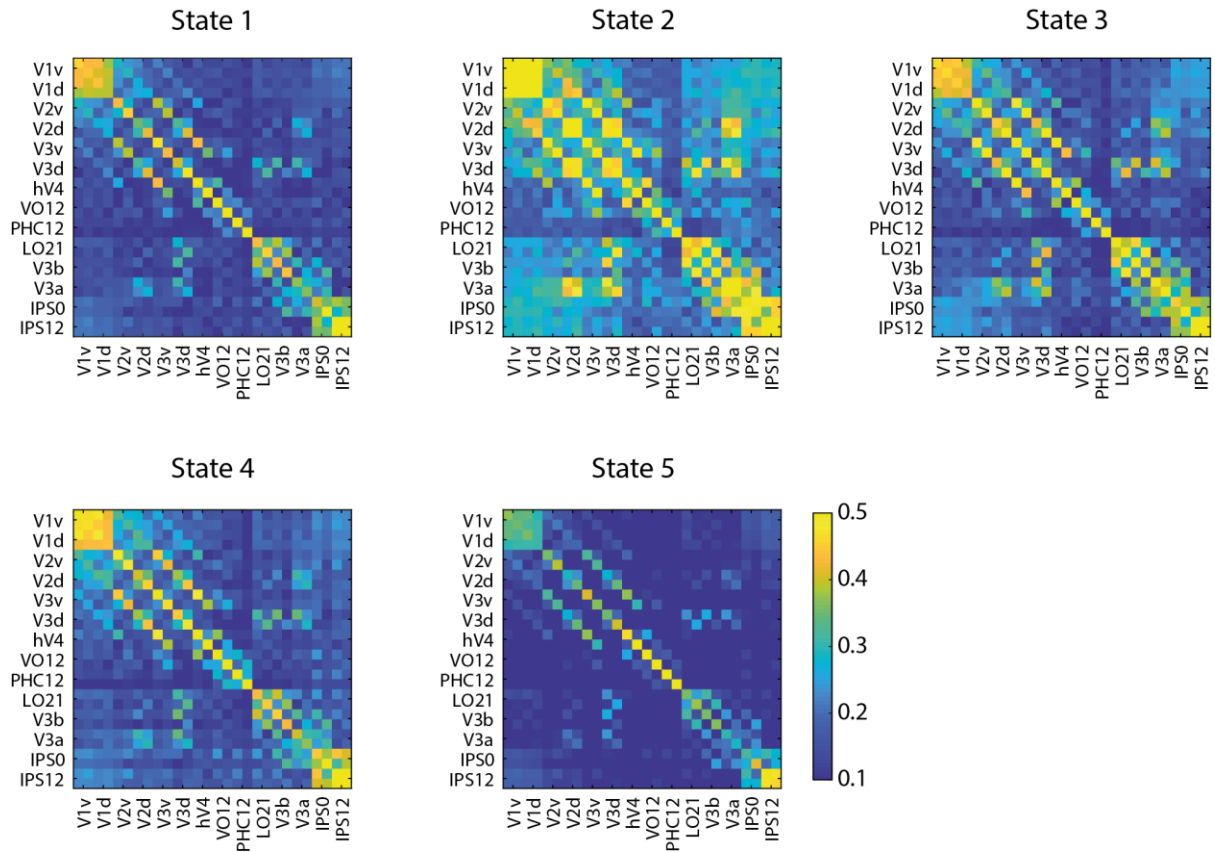

**Figure S1: Functional Connectivity matrices of HMM states:** Functional Connectivity matrices are shown as 28x28 matrices per state. For each ROI, data are included for each hemisphere (left, right). Warm colours (yellow) denote higher connectivity values, cool colours (blue) denote connectivity values close to zero.

## Supplementary Tables

**Table S1. MRS quality measures:** Cramer-Rao lower bound (CRLB), linewidth and signal-to-noise ratio (SNR) are shown for the OCT MRS voxel per group and block.

| <b>MRS quality measure</b> | <b>Block</b> | <b>Group</b> | <b>Mean</b> | <b>Std</b> |
|----------------------------|--------------|--------------|-------------|------------|
| <b>CRLB</b>                | Pre          | Anodal       | 5.67        | 1.20       |
|                            |              | Sham         | 5.65        | 1.14       |
|                            |              | Control      | 5.91        | 1.31       |
|                            | During       | Anodal       | 6.76        | 2.00       |
|                            |              | Sham         | 6.35        | 2.13       |
|                            |              | Control      | 6.23        | 1.27       |
|                            | Post         | Anodal       | 6.81        | 1.89       |
|                            |              | Sham         | 6.50        | 1.73       |
|                            |              | Control      | 5.82        | 1.05       |
| <b>Linewidth</b>           | Pre          | Anodal       | 7.83        | 0.67       |
|                            |              | Sham         | 7.96        | 0.45       |
|                            |              | Control      | 8.14        | 0.48       |
|                            | During       | Anodal       | 7.94        | 0.70       |
|                            |              | Sham         | 8.07        | 0.50       |
|                            |              | Control      | 8.20        | 0.53       |
|                            | Post         | Anodal       | 7.95        | 0.68       |
|                            |              | Sham         | 8.15        | 0.49       |
|                            |              | Control      | 8.22        | 0.56       |
| <b>SNR</b>                 | Pre          | Anodal       | 19.95       | 3.40       |
|                            |              | Sham         | 20.50       | 2.98       |
|                            |              | Control      | 19.27       | 3.58       |
|                            | During       | Anodal       | 19.33       | 3.50       |
|                            |              | Sham         | 20.00       | 3.34       |
|                            |              | Control      | 18.68       | 3.63       |
|                            | Post         | Anodal       | 20.29       | 3.77       |
|                            |              | Sham         | 20.15       | 3.01       |
|                            |              | Control      | 18.91       | 3.44       |



**Table S2: Control analyses for GABA+ correlation with behaviour:** Pearson correlations (r, p) for GABA+ change and learning rate when: regressing out the CSF percentage or using  $\alpha$ -correction to control for tissue composition within the MRS mask, using GABA+ referenced to NAA (rather than water), regressing out changes in MRS data quality (linewidth, SNR), and testing for neurotransmitter specificity (Glu change).

| <b>Group</b>         | <b>Control</b>       | <b>r</b> | <b>p</b> |
|----------------------|----------------------|----------|----------|
| <b>Anodal</b>        | %CSF                 | -0.52    | 0.017    |
|                      | $\alpha$ -correction | -0.51    | 0.018    |
|                      | GABA+/NAA            | -0.47    | 0.031    |
|                      | Linewidth            | -0.49    | 0.024    |
|                      | SNR                  | -0.50    | 0.022    |
|                      | Glu                  | -0.28    | 0.225    |
|                      | <b>Sham</b>          | %CSF     | 0.25     |
| $\alpha$ -correction |                      | 0.26     | 0.262    |
| GABA+/NAA            |                      | 0.27     | 0.248    |
| Linewidth            |                      | 0.25     | 0.291    |
| SNR                  |                      | 0.27     | 0.251    |
| Glu                  |                      | -0.07    | 0.782    |

**Table S3: Control analyses for GABA+ correlation with resting-state connectivity:** Pearson correlations (r, p) for GABA+ change and resting-state connectivity when: regressing out the CSF percentage or using  $\alpha$ -correction to control for tissue composition within the MRS mask, using GABA+ referenced to NAA (rather than water), regressing out changes in MRS data quality (linewidth, SNR), and testing for neurotransmitter specificity (Glu change).

| Connectivity   | Group         | Control              | r     | p     |
|----------------|---------------|----------------------|-------|-------|
| <b>OCT-IPS</b> | <b>Anodal</b> | %CSF                 | 0.48  | 0.039 |
|                |               | $\alpha$ -correction | 0.50  | 0.030 |
|                |               | GABA+/NAA            | 0.51  | 0.025 |
|                |               | Linewidth            | 0.49  | 0.032 |
|                |               | SNR                  | 0.48  | 0.037 |
|                |               | Glu                  | 0.03  | 0.909 |
|                | <b>Sham</b>   | %CSF                 | 0.24  | 0.396 |
|                |               | $\alpha$ -correction | 0.12  | 0.667 |
|                |               | GABA+/NAA            | 0.19  | 0.495 |
|                |               | Linewidth            | 0.14  | 0.620 |
|                |               | SNR                  | 0.13  | 0.656 |
|                |               | Glu                  | -0.22 | 0.426 |
| <b>OCT</b>     | <b>Anodal</b> | %CSF                 | -0.50 | 0.048 |
|                |               | $\alpha$ -correction | -0.53 | 0.035 |
|                |               | GABA+/NAA            | -0.54 | 0.033 |
|                |               | Linewidth            | -0.52 | 0.037 |
|                |               | SNR                  | -0.51 | 0.045 |
|                |               | Glu                  | 0.08  | 0.773 |
|                | <b>Sham</b>   | %CSF                 | 0.29  | 0.299 |
|                |               | $\alpha$ -correction | 0.20  | 0.466 |
|                |               | GABA+/NAA            | 0.25  | 0.377 |
|                |               | Linewidth            | 0.26  | 0.358 |
|                |               | SNR                  | 0.26  | 0.353 |
|                |               | Glu                  | -0.13 | 0.633 |

**Table S4. Visual regions for time-varying connectivity analysis:** Regions were selected from the Probabilistic map of Visual Topography (Wang et al., 2015). The size and the MNI coordinates of the centre of gravity for each region are shown. Regions between 30 and 100 voxels were grouped together with a neighbouring region that serves similar functionality and displayed a similar time course. Regions smaller than 30 voxels were excluded from the analysis as signals being unreliable.

| <b>Region</b> | <b>Hem.</b> | <b>Size</b> | <b>x</b> | <b>y</b> | <b>z</b> |
|---------------|-------------|-------------|----------|----------|----------|
| V1v           | L           | 462         | -6       | -89      | -5       |
|               | R           | 394         | 8        | -87      | -2       |
| V1d           | L           | 389         | -7       | -96      | 2        |
|               | R           | 359         | 11       | -94      | 5        |
| V2v           | L           | 359         | -9       | -83      | -11      |
|               | R           | 368         | 10       | -81      | -8       |
| V2d           | L           | 309         | -10      | -99      | 12       |
|               | R           | 336         | 15       | -96      | 14       |
| V3v           | L           | 247         | -17      | -79      | -12      |
|               | R           | 280         | 18       | -77      | -11      |
| V3d           | L           | 264         | -18      | -97      | 16       |
|               | R           | 253         | 24       | -94      | 16       |
| hV4           | L           | 155         | -25      | -80      | -14      |
|               | R           | 173         | 26       | -79      | -12      |
| VO1, VO2      | L           | 192         | -25      | -66      | -10      |
|               | R           | 214         | 26       | -64      | -9       |
| PHC1, PHC2    | L           | 176         | -27      | -52      | -8       |
|               | R           | 164         | 28       | -49      | -9       |
| LO1, LO2      | L           | 228         | -35      | -88      | 7        |
|               | R           | 221         | 38       | -85      | 9        |
| V3b           | L           | 111         | -29      | -90      | 17       |
|               | R           | 152         | 34       | -84      | 18       |
| V3a           | L           | 195         | -19      | -91      | 24       |
|               | R           | 359         | 21       | -88      | 28       |
| IPS0          | L           | 264         | -25      | -80      | 30       |
|               | R           | 235         | 30       | -78      | 33       |
| IPS1, IPS2    | L           | 206         | -21      | -71      | 46       |
|               | R           | 155         | 25       | -69      | 47       |

**Table S5: Control analyses for time-varying connectivity analysis:** Repeated measures ANOVA results (State x Block interaction on Fractional Occupancy) are shown per group for a range of HMM parameters (states: from 4 to 7, PCA: from 70% to 100% in increments of 10%). F and p-values are reported per test and the significant results are shown in italic.

| <b>Model</b>       | <b>Group</b>  | <b>F</b> | <b>p</b>     |
|--------------------|---------------|----------|--------------|
| states=4, PCA=70%  | <i>Anodal</i> | 7.36     | <i>0.006</i> |
|                    | Sham          | 0.62     | 0.486        |
| states=4, PCA=80%  | <i>Anodal</i> | 7.81     | <i>0.006</i> |
|                    | Sham          | 1.12     | 0.318        |
| states=4, PCA=90%  | <i>Anodal</i> | 7.42     | <i>0.009</i> |
|                    | Sham          | 1.10     | 0.318        |
| states=4, PCA=100% | <i>Anodal</i> | 9.70     | <i>0.004</i> |
|                    | Sham          | 1.73     | 0.210        |
| states=5, PCA=70%  | <i>Anodal</i> | 5.55     | <i>0.013</i> |
|                    | Sham          | 0.74     | 0.451        |
| states=5, PCA=80%  | <i>Anodal</i> | 6.22     | <i>0.010</i> |
|                    | Sham          | 1.14     | 0.319        |
| states=5, PCA=90%  | <i>Anodal</i> | 7.50     | <i>0.007</i> |
|                    | Sham          | 0.66     | 0.474        |
| states=5, PCA=100% | <i>Anodal</i> | 7.59     | <i>0.005</i> |
|                    | Sham          | 1.84     | 0.194        |
| states=6, PCA=70%  | <i>Anodal</i> | 5.99     | <i>0.005</i> |
|                    | Sham          | 0.41     | 0.688        |
| states=6, PCA=80%  | <i>Anodal</i> | 6.84     | <i>0.005</i> |
|                    | Sham          | 0.52     | 0.598        |
| states=6, PCA=90%  | <i>Anodal</i> | 7.23     | <i>0.008</i> |
|                    | Sham          | 0.54     | 0.536        |
| states=6, PCA=100% | <i>Anodal</i> | 6.93     | <i>0.009</i> |
|                    | Sham          | 1.87     | 0.190        |
| states=7, PCA=70%  | <i>Anodal</i> | 4.38     | <i>0.013</i> |
|                    | Sham          | 0.47     | 0.688        |
| states=7, PCA=80%  | <i>Anodal</i> | 5.40     | <i>0.008</i> |
|                    | Sham          | 0.65     | 0.556        |
| states=7, PCA=90%  | <i>Anodal</i> | 6.52     | <i>0.008</i> |
|                    | Sham          | 0.63     | 0.521        |
| states=7, PCA=100% | <i>Anodal</i> | 4.84     | <i>0.009</i> |
|                    | Sham          | 1.54     | 0.237        |

**Table S6: Minimum Reporting Standards in MRS checklist**

| Site (Name or Number)                                                              |                                                                                                                    | MRC Cognition and Brain Sciences Unit<br>(University of Cambridge) |  |
|------------------------------------------------------------------------------------|--------------------------------------------------------------------------------------------------------------------|--------------------------------------------------------------------|--|
| <b>1. Hardware</b>                                                                 |                                                                                                                    |                                                                    |  |
| a. Field strength [T]                                                              | 3                                                                                                                  |                                                                    |  |
| b. Manufacturer                                                                    | Siemens                                                                                                            |                                                                    |  |
| c. Model                                                                           | Prisma                                                                                                             |                                                                    |  |
| d. RF coils                                                                        | 32-channel receive head coil                                                                                       |                                                                    |  |
| e. Additional hardware                                                             | N/A                                                                                                                |                                                                    |  |
| <b>2. Acquisition</b>                                                              |                                                                                                                    |                                                                    |  |
| a. Pulse sequence                                                                  | MEGA-PRESS                                                                                                         |                                                                    |  |
| b. Volume of Interest (VOI) locations                                              | Occipito-temporal cortex                                                                                           |                                                                    |  |
| c. Nominal VOI size [cm <sup>3</sup> , mm <sup>3</sup> ]                           | 20x20x25 mm                                                                                                        |                                                                    |  |
| d. Repetition Time (TR), Echo Time (TE)<br>[ms, s]                                 | TR=3000ms, TE=68ms                                                                                                 |                                                                    |  |
| e. Total number of Excitations or acquisitions<br>per spectrum                     | 256                                                                                                                |                                                                    |  |
| f. Additional sequence parameters:                                                 | Spectral bandwidth: 1200 Hz<br><br>Spectral points: 2048                                                           |                                                                    |  |
| g. Water Suppression Method                                                        | Water suppression was achieved using variable power with optimized relaxation delays and outer volume suppression. |                                                                    |  |
| h. Shimming Method, reference peak, and thresholds for “acceptance of shim” chosen | Automated 3D head shim (GRE-BRAIN) to achieve water peak linewidth below 10 Hz.                                    |                                                                    |  |
| i. Triggering or motion correction method                                          | N/A                                                                                                                |                                                                    |  |

| 3. Data analysis methods and outputs                                    |                                                                                                                                                                                                                                                                                                                                                                                                                                                                                                                                                                                               |
|-------------------------------------------------------------------------|-----------------------------------------------------------------------------------------------------------------------------------------------------------------------------------------------------------------------------------------------------------------------------------------------------------------------------------------------------------------------------------------------------------------------------------------------------------------------------------------------------------------------------------------------------------------------------------------------|
| a. Analysis software                                                    | MRspa (preprocessing, version v1.5c),<br>LCmodel (fitting and quantification)                                                                                                                                                                                                                                                                                                                                                                                                                                                                                                                 |
| b. Processing steps deviating from quoted reference or product          | MRspa pre-processing options selected:<br>- eddy current corr.: ECC2 + zero phase<br>- frequency corr.: absolute (3.01)<br>- phase corr.: least square                                                                                                                                                                                                                                                                                                                                                                                                                                        |
| c. Output measure                                                       | Concentrations relative to water or NAA                                                                                                                                                                                                                                                                                                                                                                                                                                                                                                                                                       |
| d. Quantification references and assumptions, fitting model assumptions | We fitted model spectra of $\gamma$ -amino-butyric acid (GABA), Glutamate (Glu), Glutamine (Gln) and N acetylaspartate (NAA) to the edited spectra. The model spectra of were generated based on previously reported chemical shifts and coupling constants using the GAMMA/PyGAMMA simulation library of VESPA for carrying out the density matrix formalism. A 20 x 20 spatial matrix was used to simulate the spatial variations inside and outside the nominal PRESS dimensions. Simulations were performed with the same RF pulses and sequence timings as that on the 3T system in use. |
| 4. Data Quality                                                         |                                                                                                                                                                                                                                                                                                                                                                                                                                                                                                                                                                                               |
| a. Reported variables                                                   | See Table S1                                                                                                                                                                                                                                                                                                                                                                                                                                                                                                                                                                                  |
| b. Data exclusion criteria                                              | Water peak linewidth > 10 Hz<br><br>CRLB > 15%<br><br>GABA+ concentration outside three standard deviations from the mean across all groups and blocks.                                                                                                                                                                                                                                                                                                                                                                                                                                       |
| c. Quality measures of postprocessing Model fitting                     | See Table S1                                                                                                                                                                                                                                                                                                                                                                                                                                                                                                                                                                                  |
| d. Sample Spectrum                                                      | See Figure 3                                                                                                                                                                                                                                                                                                                                                                                                                                                                                                                                                                                  |
